# Supplementary material for: Paediatric attendances of the emergency department in a major Irish tertiary referral centre before and after expansion of free GP care to children under 6: a retrospective observational study
Source: PubMed Central journal article supplement — BMJ Paediatr Open. 2021 Feb 17;5(1):e000862. doi: 10.1136/bmjpo-2020-000862 (PMC7893646; doi:10.1136/bmjpo-2020-000862), 2021-02-17
Supplement: bmjpo-2020-000862.draft_revisions.pdf [file bmjpo-2020-000862.draft_revisions.pdf]

# BMJ Paediatrics Open

BMJ Paediatrics Open is committed to open peer review. As part of this commitment we make the peer review history of every article we publish publicly available.

When an article is published we post the peer reviewers' comments and the authors' responses online. We also post the versions of the paper that were used during peer review. These are the versions that the peer review comments apply to.

The versions of the paper that follow are the versions that were submitted during the peer review process. They are not the versions of record or the final published versions. They should not be cited or distributed as the published version of this manuscript.

BMJ Paediatrics Open is an open access journal and the full, final, typeset and author-corrected version of record of the manuscript is available on our site with no access controls, subscription charges or pay-per-view fees (<http://bmjpaedsopen.bmj.com>).

If you have any questions on BMJ Paediatrics Open's open peer review process please email [info.bmjpo@bmj.com](mailto:info.bmjpo@bmj.com)

# BMJ Paediatrics Open

## Characteristics of Paediatric Attendances of the Emergency Department in a Major Irish Tertiary Referral Centre Before and After Expansion of Free GP Care to Children Under 6

|                               |                                                                                                                                                                                                                                                                                                                                                                                                                                                                                                             |
|-------------------------------|-------------------------------------------------------------------------------------------------------------------------------------------------------------------------------------------------------------------------------------------------------------------------------------------------------------------------------------------------------------------------------------------------------------------------------------------------------------------------------------------------------------|
| Journal:                      | <i>BMJ Paediatrics Open</i>                                                                                                                                                                                                                                                                                                                                                                                                                                                                                 |
| Manuscript ID                 | bmjpo-2020-000862                                                                                                                                                                                                                                                                                                                                                                                                                                                                                           |
| Article Type:                 | Original research                                                                                                                                                                                                                                                                                                                                                                                                                                                                                           |
| Date Submitted by the Author: | 28-Sep-2020                                                                                                                                                                                                                                                                                                                                                                                                                                                                                                 |
| Complete List of Authors:     | Korotchikova, Irina; University College Cork School of Medicine, Medical Education Unit; Cork University Hospital, Emergency Medicine<br>Sheridan, Ewa; University College Cork School of Medicine, Medical Education Unit<br>O'Brien, Rory; Cork University Hospital, Emergency Medicine<br>Bradley, Colin; University College Cork School of Medicine, General Practice<br>Deasy, Conor; University College Cork School of Medicine, Medical Education Unit; Cork University Hospital, Emergency Medicine |
| Keywords:                     | Health services research, Data Collection                                                                                                                                                                                                                                                                                                                                                                                                                                                                   |
|                               |                                                                                                                                                                                                                                                                                                                                                                                                                                                                                                             |

SCHOLARONE™  
Manuscripts

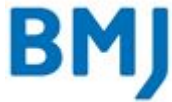

I, the Submitting Author has the right to grant and does grant on behalf of all authors of the Work (as defined in the below author licence), an exclusive licence and/or a non-exclusive licence for contributions from authors who are: i) UK Crown employees; ii) where BMJ has agreed a CC-BY licence shall apply, and/or iii) in accordance with the terms applicable for US Federal Government officers or employees acting as part of their official duties; on a worldwide, perpetual, irrevocable, royalty-free basis to BMJ Publishing Group Ltd ("BMJ") its licensees and where the relevant Journal is co-owned by BMJ to the co-owners of the Journal, to publish the Work in this journal and any other BMJ products and to exploit all rights, as set out in our [licence](#).

The Submitting Author accepts and understands that any supply made under these terms is made by BMJ to the Submitting Author unless you are acting as an employee on behalf of your employer or a postgraduate student of an affiliated institution which is paying any applicable article publishing charge ("APC") for Open Access articles. Where the Submitting Author wishes to make the Work available on an Open Access basis (and intends to pay the relevant APC), the terms of reuse of such Open Access shall be governed by a Creative Commons licence – details of these licences and which [Creative Commons](#) licence will apply to this Work are set out in our licence referred to above.

Other than as permitted in any relevant BMJ Author's Self Archiving Policies, I confirm this Work has not been accepted for publication elsewhere, is not being considered for publication elsewhere and does not duplicate material already published. I confirm all authors consent to publication of this Work and authorise the granting of this licence.

1  
2  
3 **Characteristics of Paediatric Attendances of the Emergency Department in a**  
4  
5  
6 **Major Irish Tertiary Referral Centre Before and After Expansion of Free GP**  
7  
8  
9 **Care to Children Under 6**  
10

11  
12 Irina Korotchkova<sup>1,2</sup>, Ewa Sheridan<sup>1</sup>, Rory O'Brien<sup>1,2</sup> Colin Bradley<sup>1,3</sup>, Conor Deasy<sup>1,2</sup>  
13

14  
15 <sup>1</sup> Medical Education Unit, School of Medicine, University College Cork, Ireland; <sup>2</sup> Department of  
16 Emergency Medicine, Cork University Hospital, Ireland; <sup>3</sup> Department of General Practice, University  
17 College Cork, Ireland  
18  
19  
20  
21  
22  
23  
24  
25  
26  
27  
28  
29  
30  
31  
32

33 **Corresponding Author:**

34 Dr Irina Korotchkova

35  
36  
37 *Postal address:* School of Medicine, Brookfield Health Science Complex, University College  
38 Cork, Ireland  
39

40 *E-mail:* [i.korotchkova@ucc.ie](mailto:i.korotchkova@ucc.ie)  
41

42 **Word count:** 3,040  
43  
44  
45  
46  
47  
48  
49  
50  
51  
52  
53  
54  
55  
56  
57  
58  
59  
60

## ABSTRACT

**Objectives:** To examine the characteristics of paediatric attendances to the Emergency Department (ED) in Cork University Hospital (CUH) before and after the expansion of free GP care to children under the age of 6 years.

**Design:** This is a retrospective observational study that used a large administrative dataset.

**Setting:** The study was conducted in major Irish tertiary referral centre that serves a total population of over 1.1 million. It is a public hospital, owned and managed by the Health Service Executive (HSE).

**Participants:** Children aged 0-15 years who attended CUH ED during the study period of 6 years (2012 – 2018) were included in this study (n = 76,831).

**Interventions:** Free GP care was expanded to all children aged 0-15 years in July 2015.

**Main outcome measures:** The characteristics of paediatric attendances to CUH ED were examined during 2 time periods: 3 years before the expansion of free GP care to children under 6 (July 1<sup>st</sup> 2012 – June 30<sup>th</sup> 2015) and 3 years after (July 1<sup>st</sup> 2015 – June 30<sup>th</sup> 2018). Changes in the mode of referral, i.e. GP referral, and inpatient hospital admissions through the CUH ED in the under 6s group were investigated.

**Results:** Overall paediatric presentations to CUH ED increased from 35,819 during the Time Period 1 to 41,012 during the Time Period 2 (14.5%). The proportion of the CUH ED attendances through GP referrals by children under 6s increased by over 8% ( $p < 0.0001$ ) in the Time Period 2. The proportion of children in this age group who attended the CUH ED through GP referral and who were subsequently admitted to hospital, however, decreased by over 3% ( $p < 0.0001$ ).

**Conclusion:** The expansion of free GP care has upstream health service utilisation implications, such as increased attendances at ED, and should be considered and costed by policy-makers.

## What is known about the subject

- A growing rate of Emergency Department (ED) attendances, including paediatric presentations, that contribute to overcrowding of the emergency services is a global phenomenon.
- When medical care is free of charge, children and adolescents increase the number of doctor visits.
- A 25% increase in GP attendances by children aged under 6 years was observed in Ireland following the expansion of free GP care to this age group.

## What this study adds

- A significant sustained increase in paediatric GP referrals to the ED of a major Irish tertiary referral centre was observed following the expansion of free GP care to children under 6 years.
- Despite the increase in paediatric GP referrals to Cork University Hospital (CUH) ED, the proportion of children under the age of 6 that were admitted to hospital decreased.
- The expansion of free GP care has upstream health service utilisation implications and must be considered by policy-makers.

## INTRODUCTION

There is sufficient evidence that health in childhood has strong long-term impacts on socioeconomic status and adulthood health.[1-4] Making primary care more accessible should encourage children to seek medical attention when needed and hypothetically, improve the general population health long-term.

Currently, the majority of the Irish population pay out-of-pocket fees for their General Practitioner (GP) visits and these payments for primary care are the highest among the European Union countries.[5] In 2011 the Irish Government made a commitment to introduce Universal GP Care which guaranteed free GP care for all.[6] The roll out of free GP care for children under 6 years was the first step taken by the Government towards that goal.

On July 1<sup>st</sup> 2015 all children aged under 6 years became entitled to free GP care in Ireland. The introduction of the free GP care for children aged under 6 years was aligned with the national policy as described in the Future Health Strategic Framework and aimed to ensure effective, safe and high-quality health services for young children.[7]

GP referral is the preferred mode of accessing hospital services for acute presentations in Ireland. However, direct access to ED (by self-referral) is also available though this is discouraged by the charge of a fee of €100 if attending without a GP referral. This fee is also levied in respect of children attending ED.

It has been shown that when medical care is free of charge, children and adolescents increase the number of doctor visits by 5-10%.[3] A USA-based study that estimated the average association between outpatient and inpatient care, showed that expanded use of primary care, through insurance policy changes and improved access to primary care, was associated

1  
2  
3 with a greater number of hospital presentations and an increase in inpatient spending. It was  
4  
5 noted that this was particularly the case for the conditions for which the decision to admit to  
6  
7 hospital was potentially more at the discretion of the primary care physician. Thus, increased  
8  
9 access to primary care does not always result in savings in secondary care as is often assumed  
10  
11 it will.[8]  
12  
13  
14  
15

16 By December 2016, the number of children under the age of 6 years who were eligible for  
17  
18 free GP care in Ireland doubled compared to December 2014.[9] At the same time, a 25%  
19  
20 increase in GP attendances in this age group was reported.[10] There are clear indications  
21  
22 that the Irish primary care system provided by GPs is already under pressure and may struggle  
23  
24 to meet demand in the near future.[10-12] This might have implications for upstream health  
25  
26 services, especially Emergency Departments (ED), which often serve as substitutes for  
27  
28 primary care, though not designed for this type of work.  
29  
30  
31  
32  
33

34 As the next phase of rolling out of Universal GP care has been recently announced by the Irish  
35  
36 Government, with expansion of GP care without fees to 6 and 7 year-olds this year and further  
37  
38 phased extension to all children aged under 13, it is important that all potential implications  
39  
40 are considered.  
41  
42  
43  
44

45 This study aimed to investigate the impact of free GP care to children under the age of 6 years  
46  
47 on the characteristics of paediatric attendances at Cork University Hospital (CUH) ED.  
48  
49

## 50 **METHODS**

51  
52  
53 This research was conducted in a major Irish tertiary referral centre and university training  
54  
55 hospital. Cork University Hospital is a public hospital owned and managed by the Health  
56  
57 Service Executive and serves a total population over 1.1 million.[13] Cork University Hospital  
58  
59  
60



1  
2  
3 has arguably the busiest ED in Ireland with 69,982 presentations in 2019.[13, 14] The  
4  
5 paediatric ED in CUH is audio-visually separated from the adult ED and treats all unscheduled  
6  
7 presentations including medical and trauma.  
8  
9

10  
11 The study used the electronic data from the Integrated Patient Management System (iPMS)  
12  
13 in CUH. This is an administrative dataset. All paediatric attendances (children aged 0 to 15  
14  
15 years) to CUH ED from 1<sup>st</sup> July 2012 until 30<sup>th</sup> June 2018 were identified, allowing us to  
16  
17 examine the ED attendances 3 years prior to and 3 years after the expansion of free GP care  
18  
19 for under 6s. The data included ED attendees' age, date of arrival, ED arrival time, ED  
20  
21 departure time, discharge destination, attendance type (new or return), and referral type.  
22  
23 The referral type was categorised as GP referral, including out of hours GP referrals, and non-  
24  
25 GP referrals. The triage information on reason for attendance or the treatment received is  
26  
27 not captured reliably and therefore was not analysed; however, whether the ED attendance  
28  
29 resulted in an inpatient admission, transfer to a different hospital or death was considered a  
30  
31 proxy for severity of reason for attendance.  
32  
33  
34  
35  
36  
37

38  
39 The study used the anonymised administrative data and had full approval from the Clinical  
40  
41 Ethics Committee of the Cork Teaching Hospitals. Patients were not involved in this study.  
42  
43

44  
45 Free GP care was expanded to all children aged under 6 years in July 2015. This age group (<  
46  
47 6 years) was used as the treatment group in the analysis. As CUH provides care for all children  
48  
49 aged 0 to 15 years, children aged 6 – 15 years were chosen as the control group.  
50  
51

52  
53 Two time periods were analysed:

- 54  
55 • Time Period 1: from 1<sup>st</sup> July 2012 to 30<sup>th</sup> June 2015;
- 56  
57 • Time Period 2: from 1<sup>st</sup> July 2015 to 30<sup>th</sup> June 2018.
- 58  
59  
60

1  
2  
3 To better understand the overall trend in the paediatric ED attendances in CUH over the 6-  
4 year period, a number of annual ED attendances was also analysed for each study group and  
5  
6 for single year of age (SYOA). As the data were analysed over a 12-months or 3-years periods,  
7  
8 there was no need to control for seasonal variation in ED attendances.  
9  
10

11  
12  
13 The statistical analyses were performed using the IBM SPSS Statistics 25. Categorical variables  
14 were described using number of cases and percentage (%). Two-sided  $\chi^2$  test was used  
15  
16 to evaluate the differences between the categorical variables. Post-hoc analyses were  
17  
18 performed for SYOA. Bonferroni correction was applied for multiple comparisons if *P* was less  
19  
20 than 0.05 in the initial  $\chi^2$  test.  
21  
22  
23  
24  
25

## 26 **RESULTS**

27  
28  
29 Over the period of 6 years (July 1<sup>st</sup> 2012 – June 30<sup>th</sup> 2018), CUH ED was attended by 76,831  
30  
31 children aged 0 – 15 years. Table 1 summarises all paediatric attendances to CUH ED during  
32  
33 the two study periods.  
34  
35  
36  
37  
38  
39  
40  
41  
42  
43  
44  
45  
46  
47  
48  
49  
50  
51  
52  
53  
54  
55  
56  
57  
58  
59  
60

Table 1. Descriptive statistics of the iPMS data for children under 6 (0 – 5 years) and over 6 (6 – 15 years) who attended CUH ED during the study period (July 1<sup>st</sup> 2012 – June 30<sup>th</sup> 2018).

|                               | Under 6s (0 - 5 years) |                       |                      | Over 6s (6 - 15 years) |                       |                      |
|-------------------------------|------------------------|-----------------------|----------------------|------------------------|-----------------------|----------------------|
|                               | July 2012 – June 2015  | July 2015 – June 2018 | P-value <sup>a</sup> | July 2012 – June 2015  | July 2015 – June 2018 | P-value <sup>a</sup> |
| <b>Attendances, n (%)</b>     | 19,199 (53.6)          | 22,934 (55.9)         |                      | 16,620 (46.4)          | 18,078 (44.1)         |                      |
| <b>Referral Type, n (%)</b>   |                        |                       |                      |                        |                       |                      |
| GP Referrals                  | 10,148 (52.9)          | 14,028 (61.2)         | <b>&lt; 0.0001</b>   | 8,684 (52.3)           | 9,724 (53.8)          | <b>0.004</b>         |
| Non-GP Referrals <sup>b</sup> | 9,051 (47.1)           | 8,906 (38.8)          |                      | 7,936 (47.7)           | 8,354 (46.2)          |                      |
| <b>Type of Attendance (%)</b> |                        |                       |                      |                        |                       |                      |
| New                           | 18,413 (95.9)          | 22,016 (96.0)         | 0.636                | 15,884 (95.6)          | 17,289 (95.6)         | 0.771                |
| Return                        | 786 (4.1)              | 918 (4.0)             |                      | 736 (4.4)              | 789 (4.4)             |                      |
| <b>Day of Week (%)</b>        |                        |                       |                      |                        |                       |                      |
| Sunday                        | 2,635 (13.7)           | 3,025 (13.2)          | 0.109                | 2,065 (12.4)           | 2,172 (12.0)          | 0.244                |
| Monday                        | 2,940 (15.3)           | 3,647 (15.9)          | 0.097                | 2,707 (16.3)           | 2,908 (16.1)          | 0.610                |
| Tuesday                       | 2,707 (14.1)           | 3,292 (14.4)          | 0.456                | 2,481 (14.9)           | 2,710 (15.0)          | 0.807                |
| Wednesday                     | 2,745 (14.3)           | 3,279 (14.3)          | 0.999                | 2,421 (14.6)           | 2,812 (15.6)          | 0.010                |
| Thursday                      | 2,746 (14.3)           | 3,198 (13.9)          | 0.292                | 2,441 (14.7)           | 2,662 (14.7)          | 0.920                |
| Friday                        | 2,722 (14.2)           | 3,416 (14.9)          | 0.038                | 2,261 (13.6)           | 2,538 (14.0)          | 0.241                |
| Saturday                      | 2,704 (14.1)           | 3,077 (13.4)          | 0.047                | 2,244 (13.5)           | 2,276 (12.6)          | 0.012                |
| <b>Time (%)</b>               |                        |                       |                      |                        |                       |                      |
| 00:00-05:59                   | 1,529 (8.0)            | 1,767 (7.7)           | 0.032                | 834 (5.0)              | 905 (5.0)             | 0.377                |
| 06:00-11:59                   | 3,543 (18.5)           | 4,080 (17.8)          | 0.078                | 3,308 (19.9)           | 3,719 (20.6)          |                      |
| 12:00-17:59                   | 7,440 (38.8)           | 9,197 (40.1)          | <b>0.005</b>         | 6,427 (38.7)           | 6,999 (38.7)          |                      |
| 18:00-23:59                   | 6,687 (34.8)           | 7,890 (34.4)          | 0.359                | 6,051 (36.4)           | 6,455 (35.7)          |                      |
| <b>Triage Category (%)</b>    |                        |                       |                      |                        |                       |                      |
| Immediate/Resuscitation       | 156 (0.8)              | 179 (0.8)             | 0.712                | 72 (0.4)               | 72 (0.4)              | 0.613                |
| Very Urgent/Emergency         | 4,766 (24.8)           | 7,159 (31.2)          | <b>&lt; 0.0001</b>   | 2,696 (16.2)           | 3,768 (20.8)          | <b>&lt; 0.0001</b>   |
| Urgent                        | 10,679 (55.6)          | 11,700 (51.0)         | <b>&lt; 0.0001</b>   | 9,166 (55.2)           | 9,562 (52.9)          | <b>&lt; 0.0001</b>   |
| Standard/Less Urgent          | 2,798 (14.6)           | 3,401 (14.8)          | 0.460                | 3,861 (23.2)           | 4,027 (22.3)          | 0.034                |
| Not Urgent                    | 90 (0.5)               | 275 (1.2)             | <b>&lt; 0.0001</b>   | 146 (0.9)              | 402 (2.2)             | <b>&lt; 0.0001</b>   |
| Not Triage/Return             | 710 (3.7)              | 220 (1.0)             | <b>&lt; 0.0001</b>   | 679 (4.1)              | 247 (1.4)             | <b>&lt; 0.0001</b>   |
| <b>Discharge Dest. (%)</b>    |                        |                       |                      |                        |                       |                      |
| Home                          | 13,707 (71.4)          | 17,225 (75.1)         | <b>&lt; 0.0001</b>   | 12,491 (75.2)          | 13,799 (76.3)         | 0.011                |
| Admitted                      | 5,031 (26.2)           | 5,382 (23.5)          | <b>&lt; 0.0001</b>   | 3,673 (22.1)           | 3,938 (21.8)          | 0.476                |
| Deceased                      | 16 (0.1)               | 8 (0.0)               | 0.038                | 7 (0.0)                | 6 (0.0)               | 0.668                |
| Self-Discharge                | 244 (1.3)              | 216 (0.9)             | <b>0.001</b>         | 242 (1.5)              | 214 (1.2)             | 0.026                |
| Other                         | 196 (1.0)              | 97 (0.4)              | <b>&lt; 0.0001</b>   | 202 (1.2)              | 116 (0.6)             | <b>&lt; 0.0001</b>   |

IQR = interquartile range; min = minimum; max = maximum

<sup>a</sup>  $\chi^2$  test (2-sided); Bonferroni correction was used for multiple comparisons if *P* was less than 0.05 in the initial  $\chi^2$  test for tables larger than 2 x 2. The results that remained statistically significant after the Bonferroni correction are highlighted in bold.

<sup>b</sup> Non-GP referrals includes self-referral, not specified, referral within the system, and return ED patients.

There was a 14.5% increase in all paediatric attendances in Time Period 2 (n = 41,012) compared to Time Period 1 (n = 35,819). Higher attendances were observed in the under 6 years group compared to the 6 - 15 years group in both study periods, with increases in

1  
2  
3 attendances seen after July 2015 (19,199 vs 16,620 in the Time Period 1 and 22,934 vs 18,078  
4  
5 in the Time Period 2 respectively).

6  
7  
8  
9 The proportions of children referred to CUH ED by GP were similar in both study groups in  
10  
11 Time Period 1 (52.9% in the under 6 years group and 52.3% in the 6 – 15 years group) and  
12  
13 significantly increased in Time Period 2 by 8.3% in the under 6 years group (61.2%,  $\chi^2$  test,  $P <$   
14  
15 0.0001), and by 1.5% in the 6 – 15 years group (53.8%,  $\chi^2$  test,  $P = 0.004$ ).

16  
17  
18  
19 There was a significant increase in the proportions of children in both groups that were  
20  
21 triaged as “Very Urgent/Emergency” (from 24.8% to 31.2% in under 6 years group,  $\chi^2$  test,  $P$   
22  
23  $< 0.0001$ ; from 16.2% to 20.8% in the 6 - 15 years group,  $\chi^2$  test,  $P < 0.0001$ ) and “Non Urgent”  
24  
25 (from 0.5% to 1.2% in the under 6 years group,  $\chi^2$  test,  $P < 0.0001$ ; from 0.9% to 2.2% in the 6  
26  
27 – 15 years group,  $\chi^2$  test,  $P < 0.0001$ ). At the same time a significant decrease was observed in  
28  
29 the proportion of children in both groups that were triaged as “Urgent” (from 55.6% to 51%  
30  
31 in the under 6 years group,  $\chi^2$  test,  $P < 0.0001$ ; from 55.2% to 52.9% in the 6 – 15 years group,  
32  
33  $\chi^2$  test,  $P < 0.0001$ ).

34  
35  
36  
37  
38  
39 There was a significant increase in the proportion of children in the under 6 years group in  
40  
41 Time Period 2 that attended CUH ED during the day hours (12:00 and 18:00) (from 7,440  
42  
43 (38.8%) in Time Period 1 to 9,197 (40.1%) in Time Period 2,  $\chi^2$  test,  $P = 0.005$ ).

44  
45  
46  
47 A significantly higher proportion of children in the under 6 years group was discharged home  
48  
49 from ED in Time Period 2 compared to Time Period 1 (75.1% and 71.4% respectively,  $\chi^2$  test,  
50  
51  $P < 0.0001$ ) and significantly lower proportion of children in the same age group was admitted  
52  
53 to hospital in Time Period 2 compared to Time Period 1 (23.5% and 26.2% respectively,  $\chi^2$  test,  
54  
55  $P < 0.0001$ ).

1  
2  
3 There was no difference in the proportion of children who attended CUH ED as a new or  
4 return patient during the two time periods in both study groups. Similarly, no statistically  
5  
6 significant differences were observed in the proportions of children that attended on a  
7  
8 particular day of the week between Time Period 1 and 2 for both study groups.  
9  
10

11  
12  
13 Figure 1 presents the number of CUH ED attendances by SYOA before and after the policy  
14 change regardless of the mode of referral. The number of CUH ED paediatric attendances was  
15  
16 highest in younger children with an increase in ED attendances observed in children under  
17  
18 the age of 10 years after the expansion of free GP care to under 6s. There was no change in  
19  
20 the volume of presentations in older children.  
21  
22  
23  
24

25  
26  
27 **Insert Figure 1 here**  
28

29  
30 Figure 2 demonstrates the number of children in both study groups that attended CUH ED  
31 through GP and non-GP referrals annually during the two study periods. A sustained step  
32  
33 increase in CUH ED attendances through GP referrals was observed after July 2015.  
34  
35  
36

37  
38 **Insert Figure 2 here**  
39

40  
41 The percentage of CUH ED attendances through a GP referral varied across all ages. There  
42  
43 was a significant increase in GP referral rates in children aged under 6 years after free GP care  
44  
45 for under 6s was introduced in July 2015. No significant increase was observed in GP referral  
46  
47 rates in children aged 6 – 15 years by SYOA (see Figure 3 and Table 2).  
48  
49

50  
51 **Insert Figure 3 here**  
52  
53  
54  
55  
56  
57  
58  
59  
60

Table 2. Number and percentage of CUH ED attendances in different age groups that came via a GP referral: July 2012 –June 2015 and July 2015 – June 2018.

| Age        | GP Referrals, n (%) |                     | p-value <sup>a</sup> |
|------------|---------------------|---------------------|----------------------|
|            | July 2012-June 2015 | July 2015-June 2018 |                      |
| <b>0-1</b> | 2221 (55.6)         | 3934 (66.3)         | <b>&lt;0.0001</b>    |
| <b>1-2</b> | 2254 (51.1)         | 3005 (58.9)         | <b>&lt;0.0001</b>    |
| <b>2-3</b> | 1835 (50.8)         | 2231 (59.2)         | <b>&lt;0.0001</b>    |
| <b>3-4</b> | 1515 (53.9)         | 1866 (59.5)         | <b>&lt;0.0001</b>    |
| <b>4-5</b> | 1252 (53.6)         | 1614 (60.4)         | <b>&lt;0.0001</b>    |
| <b>5-6</b> | 1072 (52.8)         | 1378 (59.4)         | <b>&lt;0.0001</b>    |
| 6-7        | 894 (55.3)          | 1193 (57.4)         | 0.208                |
| 7-8        | 878 (56.9)          | 1115 (58.2)         | 0.434                |
| 8-9        | 865 (56.0)          | 1049 (55.6)         | 0.786                |
| 9-10       | 966 (57.5)          | 1099 (56.8)         | 0.686                |
| 10-11      | 839 (52.9)          | 857 (54.3)          | 0.427                |
| 11-12      | 824 (52.6)          | 849 (53.3)          | 0.675                |
| 12-13      | 772 (51.4)          | 856 (53.3)          | 0.297                |
| 13-14      | 850 (49.8)          | 856 (51.0)          | 0.489                |
| 14-15      | 858 (47.0)          | 927 (51.1)          | 0.012                |
| 15-16      | 938 (45.8)          | 917 (46.4)          | 0.733                |

<sup>a</sup> $\chi^2$  test (2-sided). Bonferroni correction was applied for multiple comparisons. The results that remained significant are highlighted in bold.

Despite the significant increase in CUH ED attendances via a GP referral in the under 6 years group post free GP care for under 6s was introduced, a decrease in hospital admission rates across all ages in this study group was observed after July 2015 (see Figure 4 and Table 3). This reached statistical significance in children aged from 1 to 2 years (decrease from 27.6% in Time Period 1 to 23.0% in Time Period 2,  $\chi^2$  test,  $P = 0.0001$ ) and 4 to 5 years (decrease from 23.7% in Time Period 1 to 16.4% in Time Period 2,  $\chi^2$  test,  $P < 0.0001$ ).

Insert Figure 4 here

Table 3. Percentage of patients who attended CUH ED via a GP referral and were either admitted to ward, transferred to a different hospital or deceased across all age groups: July 2012 – June 2015 and July 2015 – June 2018.

| Age   | Admitted/Transferred/Deceased, n (%) of all Attendances through GP referrals |                     | P-value <sup>a</sup> |
|-------|------------------------------------------------------------------------------|---------------------|----------------------|
|       | July 2012-June 2015                                                          | July 2015-June 2018 |                      |
| 0-1   | 837 (37.7)                                                                   | 1339 (34.0)         | 0.004                |
| 1-2   | 622 (27.6)                                                                   | 692 (23.0)          | <b>0.0001</b>        |
| 2-3   | 408 (22.2)                                                                   | 410 (18.4)          | 0.002                |
| 3-4   | 304 (20.1)                                                                   | 337 (18.1)          | 0.127                |
| 4-5   | 297 (23.7)                                                                   | 265 (16.4)          | <b>&lt;0.0001</b>    |
| 5-6   | 251 (23.4)                                                                   | 278 (20.2)          | 0.053                |
| 6-7   | 195 (21.8)                                                                   | 263 (22.0)          | 0.947                |
| 7-8   | 191 (21.8)                                                                   | 232 (20.8)          | 0.566                |
| 8-9   | 197 (22.8)                                                                   | 193 (18.4)          | 0.018                |
| 9-10  | 194 (20.1)                                                                   | 233 (21.2)          | 0.531                |
| 10-11 | 192 (22.9)                                                                   | 191 (22.3)          | 0.769                |
| 11-12 | 200 (24.3)                                                                   | 206 (24.3)          | 0.997                |
| 12-13 | 174 (22.5)                                                                   | 186 (21.7)          | 0.694                |
| 13-14 | 171 (20.1)                                                                   | 198 (23.2)          | 0.105                |
| 14-15 | 207 (24.2)                                                                   | 209 (22.6)          | 0.396                |
| 15-16 | 254 (27.1)                                                                   | 207 (22.5)          | 0.020                |

<sup>a</sup>  $\chi^2$  test (2-sided). Bonferroni correction was applied for multiple comparisons. The results that remain significant are highlighted in bold.

Insert Table 3 here

## DISCUSSION

This study has shown that following the expansion of free GP care to children under 6 years in Ireland, there was an overall increase in CUH ED attendances with a significant increase in attendances via a GP referral in children under 6 years. GP referral rates remained higher in the under 6 years group during the 3-year period post-expansion. Despite more than an 8% increase in the GP referral rates in the under 6 years group, there was a noticeable decrease in hospital admission rates in the same age group.

Previous quasi-experimental research study on the same age group in Ireland also reported an increase in the rate of GP referral to EDs in under 6s following the introduction of free GP care for under 6s.[15] The percentage increase reported in this study, however, was smaller

1  
2  
3 than in our study (2% vs 8.3% respectively). This might be explained by the fact that the data  
4  
5 analysed in this study were from 28 different Irish hospitals with different levels of care and  
6  
7 were not reported for individual hospitals. Also, the observation periods in this study were  
8  
9 much shorter than in our study and included only 6 months before and 12 months after the  
10  
11 expansion of free GP care to under 6s, with the relevant 6-months periods compared. A much  
12  
13 higher increase in GP referral rates in the under 6 years group following the policy change in  
14  
15 our study can be explained by the fact that CUH is a major tertiary hospital with an extensive  
16  
17 catchment area. Moreover, the results of our study are based on longer observation periods  
18  
19 with overall and annual attendances compared 3 years before and 3 years after free GP care  
20  
21 for under 6s was introduced.  
22  
23  
24  
25  
26  
27

28 Emergency department crowding is a global phenomenon with many contributing factors  
29  
30 including inadequate access to primary care and specialists, inappropriate patient referral and  
31  
32 the general public expectations of health care delivery.[16] A growing rate of ED attendances,  
33  
34 including paediatric presentations, that contribute to overcrowding of the emergency  
35  
36 services has been reported in a number of countries. An Australian study based in a tertiary  
37  
38 paediatric referral hospital with 32 000 annual attendances reported an 11.3% increase in  
39  
40 paediatric presentations from 2012/2013 to 2013/2014.[17] The US National Health Interview  
41  
42 Survey found that 25% of children younger than 5 years and 18% of those aged 6 to 17 years  
43  
44 had been seen in ED at least once in 2018, compared to 23% and 15% respectively in 2017.[18]  
45  
46 The over utilisation of the paediatric ED services has been reported in the Lombardy Region  
47  
48 of Italy with 26.8% of all children in the region attending the ED at least once during 2012.[19]  
49  
50 While the overuse of the paediatric ED seems a universal problem, differences in the structure  
51  
52 of healthcare between countries have varying impacts. For example, the same study from  
53  
54 Lombardy found that only 2% of all children in the study were referred to ED by their primary  
55  
56  
57  
58  
59  
60



1  
2  
3 care physician, whereas 89% presented on parental request with no referral.[19] Different  
4  
5 structure of the primary care in Italy where family paediatricians provide primary health care  
6  
7 to all children under the age of 6 years and optionally, depending on parental preferences, up  
8  
9 to the age of 14 years, might partially explain the low referral rate to ED by primary care  
10  
11 physicians. Whereas the high self-referral rate could be explained by the fact that in Italy all  
12  
13 paediatric ED attendances under the age of 14 years are free of charge regardless of the mode  
14  
15 of presentation.[19]  
16  
17  
18  
19

20  
21 It is obvious that the impact of free GP care expansion on paediatric ED use is multifactorial  
22  
23 and clearly dependent on the existing health care system. In our study, a significant increase  
24  
25 in GP referrals to ED for children aged under 6 years is important for several reasons. Firstly,  
26  
27 it might be reflective of increased pressure placed on already strained primary care system  
28  
29 by increased demand and insufficient number of GPs to meet this demand.[10] Secondly,  
30  
31 increased paediatric ED attendances are likely to contribute to ED overcrowding. When free  
32  
33 GP care was expanded to children under 6 years of age in Ireland, no structural reorganisation  
34  
35 or financial support was introduced for the upstream services, including ED. Secondly, despite  
36  
37 significant increases in GP referrals of children under 6 years to CUH ED, there was a  
38  
39 significant drop in hospital admission rates in this category of patients, the largest reaching  
40  
41 more than 7% in children aged 4 to 5 years. This suggests that some of these ED presentations  
42  
43 may have been for minor conditions and could have been potentially avoided. Some may  
44  
45 have been driven by a desire by parents and GPs to have a second opinion to resolve  
46  
47 diagnostic uncertainty for conditions that ultimately transpired to be self-limiting.  
48  
49  
50  
51  
52  
53

54  
55 Based on our findings several conclusions can be drawn. As the introduction of free GP care  
56  
57 for children under 6s increases pressure on paediatric ED services, there is a strong need for  
58  
59  
60

1  
2  
3 investment in paediatric emergency medicine in Ireland in order to meet the increasing  
4 demands of these increasing ED presentation rates. A short stay paediatric unit, for example,  
5  
6 has been shown to improve patient care in a cost-effective way and it could be a useful  
7  
8 addition to the existing ED services.[20] Supplying the ED with the appropriate support  
9  
10 structures and adequate staffing must also be considered.  
11  
12  
13  
14

15  
16 Better support for the primary care providers is also important. Introduction of a capitation  
17  
18 payment system in Norway led to an increased GP referral rates to private hospitals and  
19  
20 clinics, possibly because there was no financial incentive to undertake the procedures in the  
21  
22 GP clinic. [21] Some of the possible options, therefore would be to consider a blended model  
23  
24 whereby GPs are remunerated for simple procedures when appropriate, for example for  
25  
26 managing minor injuries. A further recommendation could also include widening the GPs  
27  
28 access to simple diagnostics, in particular x-ray. The introduction of telemedicine  
29  
30 consultations with general paediatricians and paediatric specialists for GPs,[22] as well as  
31  
32 establishing new acute paediatric assessment services such as rapid access clinics and  
33  
34 paediatric assessment units,[23, 24] should also be explored.  
35  
36  
37  
38  
39  
40

### 41 **Strengths and limitations**

42  
43  
44 This is the first Irish study that has evaluated the characteristics of paediatric ED attendances  
45  
46 of the major tertiary referral centre 3 years before and 3 years after the expansion of free GP  
47  
48 care to children aged under 6 years. The observations collected over a 6-years period allow  
49  
50 to avoid the seasonal variation in paediatric attendances bias.  
51  
52  
53

54  
55 Several limitations are recognised in this study. First, due to the large dataset and inconsistent  
56  
57 data entry we were unable to analyse the reason for CUH ED attendance by patients. This  
58  
59 information would have been useful to better understand the spectrum of reasons for GP  
60

1  
2  
3 referrals and therefore, help to design potential solutions for the primary care support.  
4  
5 Secondly, our findings might not be applicable to other Irish hospitals with smaller catchment  
6  
7 areas and different ED structures.  
8  
9

## 10 11 **CONCLUSION**

12  
13  
14 Our study shows that there was a significant increase in paediatric GP referrals to CUH ED  
15  
16 following the expansion of free GP care to children under 6 years. At the same time the  
17  
18 hospital admission rates in the same category of patients significantly decreased suggesting  
19  
20 that many of these CUH ED visits could have been potentially avoided should there have been  
21  
22 sufficient support available for the primary care providers. This increased use of the paediatric  
23  
24 ED services that this study showed might be reflective of the struggle of the primary care to  
25  
26 meet the increased healthcare system demand and might have serious implications for the  
27  
28 quality and safety of patients' hospital care. It is of vital importance to develop strategies to  
29  
30 support both primary and secondary health care before the next phase of Universal GP Care  
31  
32 is rolled out.  
33  
34  
35  
36  
37

38  
39  
40 **Contributors** All the authors contributed equally to the study. IK and CD were involved in  
41  
42 designing the study and planning the data analysis. IK undertook the statistical analysis and  
43  
44 wrote the first draft of the manuscript. ES was involved in data collection and management.  
45  
46 RO'B, CB and CD contributed in writing the manuscript. CD supervised the study. All authors  
47  
48 contributed to and have approved the final manuscript.  
49  
50  
51

52  
53 **Funding** The study had no financial support.  
54

55  
56 **Competing interests** None declared.  
57

58  
59 **Patient consent** Not required.  
60

### Figures' legends:

**Figure 1.** Number of CUH ED attendances by age, regardless of the mode of referral: July 1<sup>st</sup> 2012 – June 30<sup>th</sup> 2015 and July 1<sup>st</sup> 2015 – June 30<sup>th</sup> 2018. 0 – 15 years.

**Figure 1.** The number of CUH ED attendances through GP and non-GP referral in the under 6 years and 6 to 15 years groups each year from July 1<sup>st</sup>, 2012 to June 30<sup>th</sup>, 2018.

**Figure 3.** Percentage of CUH ED attendances through GP referral in different age groups: July 2012 – June 2015 and July 2015 – June 2018.

**Figure 4.** Percentage of patients who were either admitted to ward, transferred to a different hospital, or deceased out of all CUH ED attendances that came through a GP referral: July 2012 – June 2015 and July 2015 – June 2018.

### REFERENCES

- 1 Case A, Fertig A, Paxson C. The lasting impact of childhood health and circumstance. *J Health Econ.* 2005;24(2):365-89.doi:10.1016/j.jhealeco.2004.09.008
- 2 Lundborg P, Nilsson A, Rooth DO. Adolescent health and adult labor market outcomes. *J Health Econ.* 2014;37(1):25-40.doi:10.1016/j.jhealeco.2014.05.003
- 3 Nilsson A, Paul A. Patient cost-sharing, socioeconomic status, and children's health care utilization. *J Health Econ.* 2018;59:109-24.doi:<https://doi.org/10.1016/j.jhealeco.2018.03.006>
- 4 Smith JP. The Impact of Childhood Health on Adult Labor Market Outcomes. *Rev Econ Stat.* 2009;91(3):478-89.doi:10.1162/rest.91.3.478
- 5 Kringos D, Boerma W, Bourgueil Y, et al. The strength of primary care in Europe: an international comparative study. *Br J Gen Pract.* 2013;63(616):e742-50.doi:10.3399/bjgp13X674422
- 6 Connolly S, Nolan A, Walsh B, et al. Universal GP Care in Ireland: Potential Cost Implications [GP care; healthcare expenditure; Ireland]. 2018 [updated 2018-04-06. 2018-03-27:[Available from: <https://www.esri.ie/publications/universal-gp-care-in-ireland-potential-cost-implications> accessed April 5th 2020.
- 7 A Framework for Improved Health and Wellbeing 2013-2023: Department of Health; 2013 [Available from: <https://health.gov.ie/wp-content/uploads/2014/03/HealthyIrelandBrochureWA2.pdf> accessed September 30th 2019.
- 8 Kaestner R, Lo Sasso AT. Does seeing the doctor more often keep you out of the hospital? *J Health Econ.* 2015;39:259-72.doi:10.1016/j.jhealeco.2014.08.003
- 9 PCRS. Statistical analysis of claims and payments 2017 [Available from: <https://www.hse.ie/eng/staff/pcrs/pcrs-publications/pcrs-annual-report-2016.pdf> accessed April 15th 2020.
- 10 O'Callaghan ME, Zgaga L, O'Ciardha D, et al. Free Children's Visits and General Practice Attendance. *Ann Fam Med.* 2018;16(3):246-9.doi:10.1370/afm.2229
- 11 Collins C MG, O'Ciardha D, Ryan K. Irish College of General Practitioners (ICGP). Planning for the future Irish general practitioner workforce–informed by a national survey of GP trainees and recent GP graduates 2017 [Available from:

1  
2  
3 [http://www.lenus.ie/hse/bitstream/10147/617140/1/Planning\\_for\\_the\\_Future\\_Irish\\_General\\_Practitioner\\_Workforce.pdf](http://www.lenus.ie/hse/bitstream/10147/617140/1/Planning_for_the_Future_Irish_General_Practitioner_Workforce.pdf) accessed April 5th 2020.

6 12 Teljeur C, Thomas S, O'Kelly FD, et al. General practitioner workforce planning: assessment of four policy directions. *BMC Health Serv Res.* 2010;10:148.doi:10.1186/1472-6963-10-148

8 13 CUH.HSE. 2020 [Available from: <http://www.cuh.hse.ie/> accessed May 5th 2020.

11 14 Emergency Department Profile: Irish Association for Emergency Medicine; [Available from: <http://www.iaem.ie/public/irish-emergency-departments/cork-university-hospital-cuh/> accessed September 30th 2019.

14 15 Walsh B, Nolan A, Brick A, et al. Did the expansion of free GP care impact demand for Emergency Department attendances? A difference-in-differences analysis. *Soc Sci Med.*

16 2019;222:101-11.doi:<https://doi.org/10.1016/j.socscimed.2018.12.029>

18 16 Jayaprakash N, O'Sullivan R, Bey T, et al. Crowding and delivery of healthcare in emergency departments: the European perspective. *West J Emerg Med.* 2009;10(4):233-9.doi:

20 17 Cheek JA, Braitberg G, Craig S, et al. Why do children present to emergency departments? Exploring motivators and measures of presentation appropriateness for children presenting to a paediatric emergency department. *J Paediatr Child Health.* 2017;53(5):451-7.doi:10.1111/jpc.13482

22 18 Centers for Disease Control and Prevention. National Health Interview Survey 2018 [Available from: <https://www.cdc.gov/nchs/nhis/SHS.htm> accessed July 10th 2020.

24 19 Riva B, Clavenna A, Cartabia M, et al. Emergency department use by paediatric patients in Lombardy Region, Italy: a population study. *BMJ Paediatr Open.*

26 2018;2(1):e000247.doi:10.1136/bmjpo-2017-000247

28 20 Browne GJ. A short stay or 23-hour ward in a general and academic children's hospital: are they effective? *Pediatr Emerg Care.* 2000;16(4):223-9.doi:10.1097/00006565-200008000-00001

30 21 Iversen T, Lurås H. The effect of capitation on GPs' referral decisions. *Health Econ.* 2000;9(3):199-210.doi:10.1002/(sici)1099-1050(200004)9:3<199::Aid-hec514>3.0.Co;2-2

32 22 Burke BL, Jr., Hall RW, Section On Telehealth C. Telemedicine: Pediatric Applications. *Pediatrics.* 2015;136(1):e293-e308.doi:10.1542/peds.2015-1517

34 23 Ogilvie D. Hospital based alternatives to acute paediatric admission: a systematic review. *Arch Dis Child.* 2005;90(2):138-42.doi:10.1136/adc.2003.035543

36 24 Williams L, Fryer J, Andrew R, et al. Setting up a Paediatric Rapid Access Outpatient Unit: views of general practice teams. *BMC Fam Pract.* 2008;9:54-.doi:10.1186/1471-2296-9-54

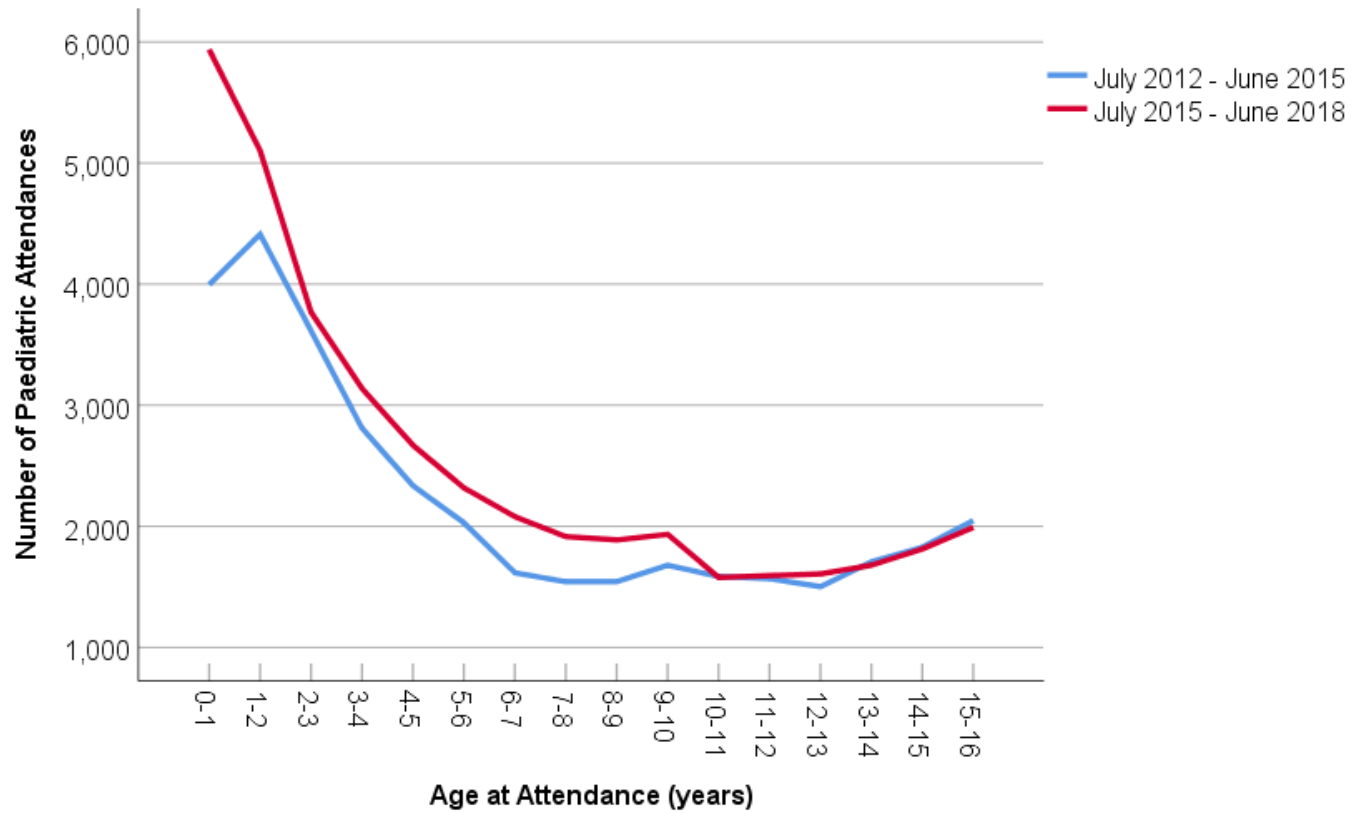

Figure 1. Number of CUH ED attendances by age, regardless of the mode of referral: July 1<sup>st</sup> 2012 – June 30<sup>th</sup> 2015 and July 1<sup>st</sup> 2015 – June 30<sup>th</sup> 2018. 0 – 15 years.

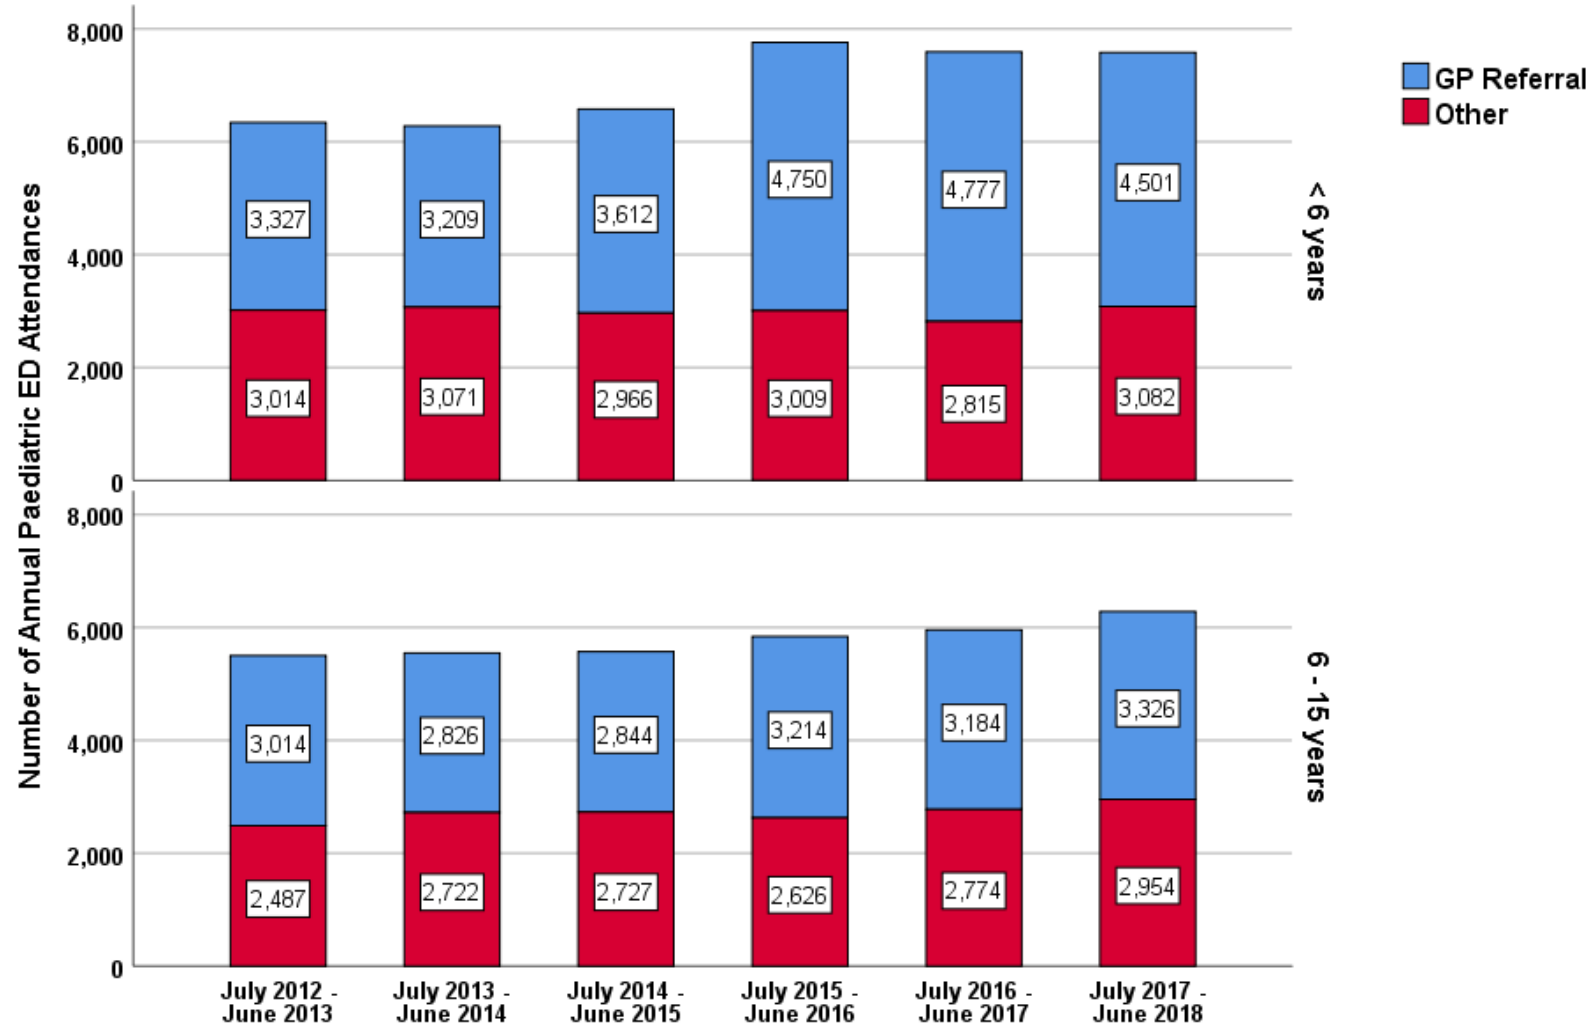

Figure 1. The number of CUH ED attendances through GP and non-GP referral in the under 6 years and 6 to 15 years groups each year from July 1<sup>st</sup>, 2012 to June 30<sup>th</sup>, 2018.

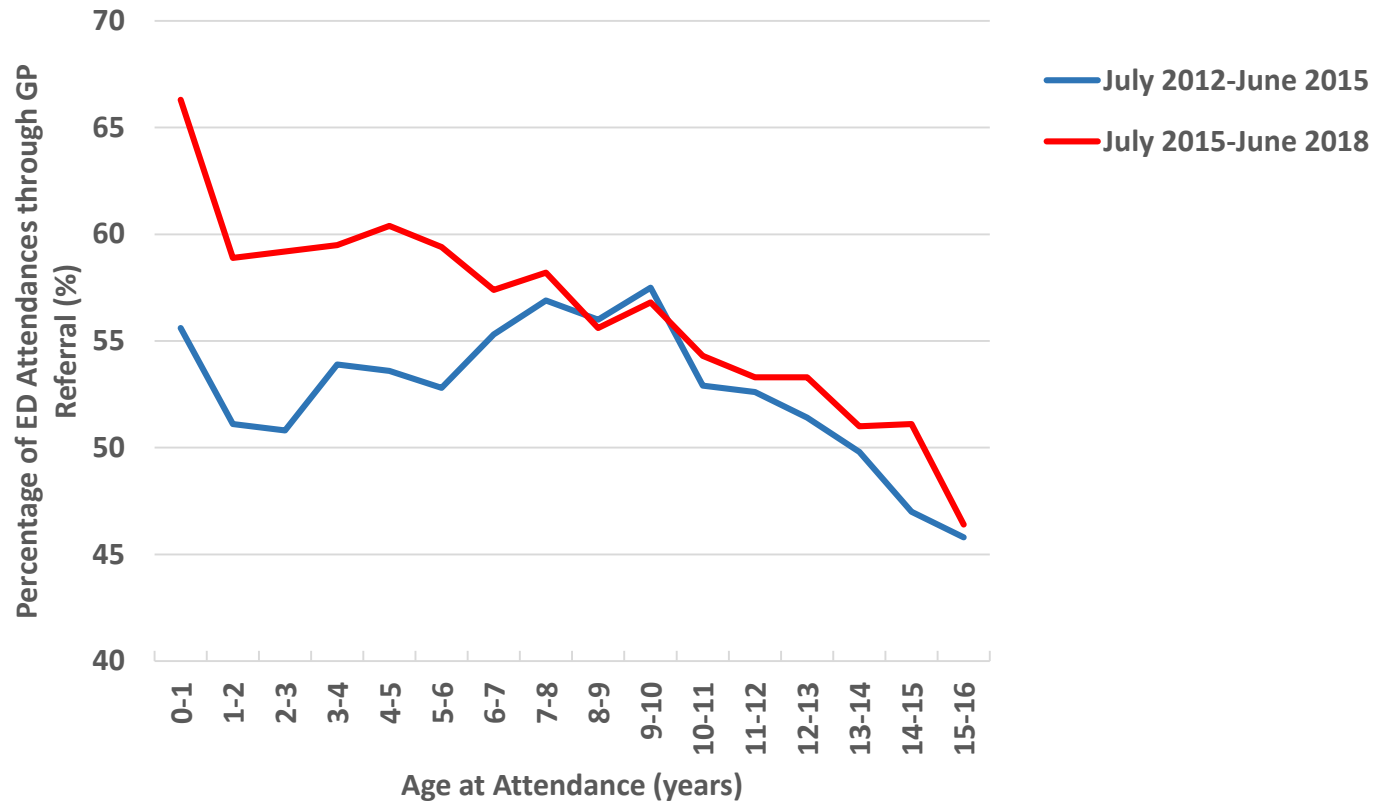

Figure 3. Percentage of CUH ED attendances through GP referral in different age groups: July 2012 – June 2015 and July 2015 – June 2018.



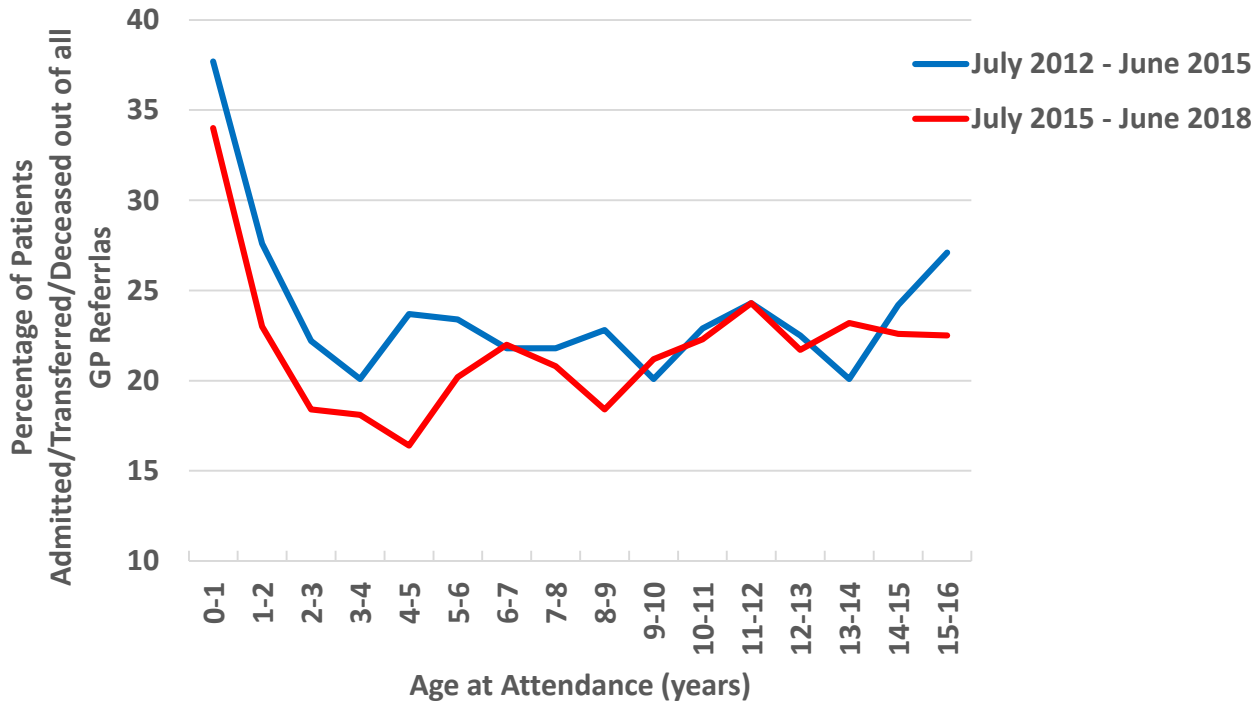

Figure 4. Percentage of patients who were either admitted to ward, transferred to a different hospital, or deceased out of all CUH ED attendances that came through a GP referral: July 2012 – June 2015 and July 2015 – June 2018.

View Only

# BMJ Paediatrics Open

## Paediatric Attendances of the Emergency Department in a Major Irish Tertiary Referral Centre Before and After Expansion of Free GP Care to Children Under 6: A Retrospective Observational Study

|                               |                                                                                                                                                                                                                                                                                                                                                                                                                                                                                                                                                                                                   |
|-------------------------------|---------------------------------------------------------------------------------------------------------------------------------------------------------------------------------------------------------------------------------------------------------------------------------------------------------------------------------------------------------------------------------------------------------------------------------------------------------------------------------------------------------------------------------------------------------------------------------------------------|
| Journal:                      | <i>BMJ Paediatrics Open</i>                                                                                                                                                                                                                                                                                                                                                                                                                                                                                                                                                                       |
| Manuscript ID                 | bmjpo-2020-000862.R1                                                                                                                                                                                                                                                                                                                                                                                                                                                                                                                                                                              |
| Article Type:                 | Original research                                                                                                                                                                                                                                                                                                                                                                                                                                                                                                                                                                                 |
| Date Submitted by the Author: | 06-Jan-2021                                                                                                                                                                                                                                                                                                                                                                                                                                                                                                                                                                                       |
| Complete List of Authors:     | Korotchikova, Irina; University College Cork School of Medicine, Medical Education Unit; Cork University Hospital, Emergency Medicine<br>Alkhalaf, Sukainah; University College Cork School of Public Health; INFANT Centre<br>Sheridan, Ewa; University College Cork School of Medicine, Medical Education Unit<br>O'Brien, Rory; Cork University Hospital, Emergency Medicine<br>Bradley, Colin; University College Cork School of Medicine, General Practice<br>Deasy, Conor; University College Cork School of Medicine, Medical Education Unit; Cork University Hospital, Emergency Medicine |
| Keywords:                     | Health services research, Data Collection                                                                                                                                                                                                                                                                                                                                                                                                                                                                                                                                                         |
|                               |                                                                                                                                                                                                                                                                                                                                                                                                                                                                                                                                                                                                   |

SCHOLARONE™  
Manuscripts

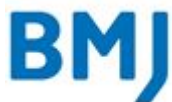

I, the Submitting Author has the right to grant and does grant on behalf of all authors of the Work (as defined in the below author licence), an exclusive licence and/or a non-exclusive licence for contributions from authors who are: i) UK Crown employees; ii) where BMJ has agreed a CC-BY licence shall apply, and/or iii) in accordance with the terms applicable for US Federal Government officers or employees acting as part of their official duties; on a worldwide, perpetual, irrevocable, royalty-free basis to BMJ Publishing Group Ltd ("BMJ") its licensees and where the relevant Journal is co-owned by BMJ to the co-owners of the Journal, to publish the Work in this journal and any other BMJ products and to exploit all rights, as set out in our [licence](#).

The Submitting Author accepts and understands that any supply made under these terms is made by BMJ to the Submitting Author unless you are acting as an employee on behalf of your employer or a postgraduate student of an affiliated institution which is paying any applicable article publishing charge ("APC") for Open Access articles. Where the Submitting Author wishes to make the Work available on an Open Access basis (and intends to pay the relevant APC), the terms of reuse of such Open Access shall be governed by a Creative Commons licence – details of these licences and which [Creative Commons](#) licence will apply to this Work are set out in our licence referred to above.

Other than as permitted in any relevant BMJ Author's Self Archiving Policies, I confirm this Work has not been accepted for publication elsewhere, is not being considered for publication elsewhere and does not duplicate material already published. I confirm all authors consent to publication of this Work and authorise the granting of this licence.

1  
2  
3 **Paediatric Attendances of the Emergency Department in a Major Irish**  
4  
5  
6 **Tertiary Referral Centre Before and After Expansion of Free GP Care to**  
7  
8  
9 **Children Under 6: A Retrospective Observational Study**  
10

11  
12 Irina Korotchkova<sup>1,2</sup>, Sukainah Alkhalaf<sup>3,4</sup>, Ewa Sheridan<sup>1</sup>, Rory O'Brien<sup>1,2</sup> Colin Bradley<sup>1,5</sup>,  
13  
14  
15 **Conor Deasy<sup>1,2</sup>**  
16

17  
18 <sup>1</sup> Medical Education Unit, School of Medicine, University College Cork, Ireland; <sup>2</sup> Department of  
19 Emergency Medicine, Cork University Hospital, Ireland; <sup>3</sup> School of Public Health, University College  
20 Cork, Ireland; <sup>4</sup> INFANT Research Centre, University College Cork, Ireland; <sup>5</sup> Department of General  
21 Practice, University College Cork, Ireland  
22  
23  
24  
25  
26  
27  
28  
29  
30  
31  
32  
33  
34  
35  
36

37 **Corresponding Author:**

38  
39 Dr Irina Korotchkova

40  
41 *Postal address:* School of Medicine, Brookfield Health Science Complex, University College  
42 Cork, Ireland  
43

44 *E-mail:* [i.korotchkova@ucc.ie](mailto:i.korotchkova@ucc.ie)  
45

46 **Word count:** 3,530  
47  
48  
49  
50  
51  
52  
53  
54  
55  
56  
57  
58  
59  
60

## ABSTRACT

**Objectives:** To examine the characteristics of paediatric attendances to the Emergency Department (ED) in Cork University Hospital (CUH) before and after the expansion of free GP care to children under the age of 6 years.

**Design:** This is a retrospective observational study that used a large administrative dataset.

**Setting:** The study was conducted in major Irish tertiary referral centre that serves a total population of over 1.1 million. It is a public hospital, owned and managed by the Health Service Executive.

**Participants:** Children aged 0-15 years who attended CUH ED during the study period of 6 years (2012 – 2018) were included in this study (n = 76,831).

**Interventions:** Free GP care was expanded to all children aged 0-5 years in July 2015.

**Main outcome measures:** Paediatric attendances to CUH ED were examined before (Time Period 1: July 2012 - June 2015) and after (Time Period 2: July 2015 - June 2018) the expansion of free GP care to children under 6. Changes in GP referral rates and inpatient hospital admissions were investigated.

**Results:** Paediatric presentations to CUH ED increased from 35,819 during the Time Period 1 to 41,012 during the Time Period 2 (14.5%). The proportion of the CUH ED attendances through GP referrals by children under 6s increased by over 8% in the Time Period 2 (from 10,148 to 14,028). Although the number of all children who attended CUH ED and were admitted to hospital increased in Time Period 2 (from 8,704 to 9,320); the proportion of children in the 0-5 years group who attended the CUH ED through GP referral and were subsequently admitted to hospital, decreased by over 3%.

**Conclusion:** The expansion of free GP care has upstream health service utilisation implications, such as increased attendances at ED, and should be considered and costed by policy-makers.

## What is known about the subject

- A growing rate of Emergency Department (ED) attendances, including paediatric presentations, that contribute to overcrowding of the emergency services is a global phenomenon.
- When medical care is free of charge, children and adolescents increase the number of doctor visits.
- A 25% increase in GP attendances by children aged under 6 years was observed in Ireland following the expansion of free GP care to this age group.

## What this study adds

- A significant sustained increase in paediatric GP referrals to the ED of a major Irish tertiary referral centre was observed following the expansion of free GP care to children under 6 years.
- Despite the increase in paediatric GP referrals to Cork University Hospital (CUH) ED, the proportion of children under the age of 6 that were admitted to hospital decreased.
- The expansion of free GP care has upstream health service utilisation implications and must be considered by policy-makers.

## INTRODUCTION

There is sufficient evidence that health in childhood has strong long-term impacts on socioeconomic status and adulthood health.[1-4] Making primary care more accessible should encourage children to seek medical attention when needed and hypothetically, improve the general population health long-term.

Currently, the majority of the Irish population pay out-of-pocket fees for their General Practitioner (GP) visits and these payments for primary care are the highest among the European Union countries.[5] In 2011 the Irish Government made a commitment to introduce Universal GP Care which guaranteed free GP care for all.[6] The roll out of free GP care for children under 6 years was the first step taken by the Government towards that goal.

On July 1<sup>st</sup> 2015 all children aged under 6 years became entitled to free GP care in Ireland. The introduction of the free GP care for children aged under 6 years was aligned with the national policy as described in the Future Health Strategic Framework and aimed to ensure effective, safe and high-quality health services for young children.[7]

GP referral is the preferred mode of accessing hospital services for acute presentations in Ireland. However, direct access to ED (by self-referral) is also available though this is discouraged by the charge of a fee of €100 if attending without a GP referral. This fee is also levied in respect of children attending ED.

It has been shown that when medical care is free of charge, children and adolescents increase the number of doctor visits by 5-10%.[3] A USA-based study that estimated the average association between outpatient and inpatient care, showed that expanded use of primary care, through insurance policy changes and improved access to primary care, was associated

1  
2  
3 with a greater number of hospital presentations and an increase in inpatient spending. It was  
4  
5 noted that this was particularly the case for the conditions for which the decision to admit to  
6  
7 hospital was potentially more at the discretion of the primary care physician. Thus, increased  
8  
9 access to primary care does not always result in savings in secondary care as is often assumed  
10  
11 it will.[8]  
12  
13  
14  
15

16 By December 2016, the number of children under the age of 6 years who were eligible for  
17  
18 free GP care in Ireland doubled compared to December 2014.[9] At the same time, a 25%  
19  
20 increase in GP attendances in this age group was reported.[10] There are clear indications  
21  
22 that the Irish primary care system provided by GPs is already under pressure and may struggle  
23  
24 to meet demand in the near future.[10-12] This might have implications for upstream health  
25  
26 services, especially Emergency Departments (ED), which often serve as substitutes for  
27  
28 primary care, though not designed for this type of work.  
29  
30  
31  
32

33 As the next phase of rolling out of Universal GP care was been announced on January 5<sup>th</sup>,  
34  
35 2020 by the Irish Government, with expansion of GP care without fees to 6 and 7 year-olds  
36  
37 this year and further phased extension to all children aged under 13, it is important that all  
38  
39 potential implications are considered.  
40  
41  
42  
43

44 This study aimed to investigate the impact of free GP care to children under the age of 6 years  
45  
46 on the characteristics of paediatric attendances at Cork University Hospital (CUH) ED.  
47  
48

## 49 **METHODS**

50  
51  
52 This research was conducted in a major Irish tertiary referral centre and university training  
53  
54 hospital. Cork University Hospital is a public hospital owned and managed by the Health  
55  
56 Service Executive and serves a total population over 1.1 million.[13] Cork University Hospital  
57  
58  
59  
60



1  
2  
3 has arguably the busiest ED in Ireland with 69,982 presentations in 2019.[13, 14] The  
4  
5 paediatric ED in CUH is audio-visually separated from the adult ED and treats all unscheduled  
6  
7 presentations including medical and trauma.  
8  
9

10  
11 The study used the electronic data from the Integrated Patient Management System (iPMS)  
12  
13 in CUH. This is an administrative dataset. All paediatric attendances (children aged 0-15 years)  
14  
15 to CUH ED from 1<sup>st</sup> July 2012 until 30<sup>th</sup> June 2018 were identified, allowing us to examine the  
16  
17 ED attendances 3 years prior to and 3 years after the expansion of free GP care for under 6s.  
18  
19 The data included ED attendees' age, date of arrival, ED arrival time, ED departure time,  
20  
21 discharge destination, attendance type (new or return), and referral type. The referral type  
22  
23 was categorised as GP referral, including out of hours GP referrals, and non-GP referrals. The  
24  
25 triage information on reason for attendance or the treatment received is not captured reliably  
26  
27 and therefore was not analysed; however, whether the ED attendance resulted in an inpatient  
28  
29 admission, transfer to a different hospital or death was considered a proxy for severity of  
30  
31 reason for attendance.  
32  
33  
34  
35  
36  
37

38  
39 The study used the anonymised administrative data and had full approval from the Clinical  
40  
41 Ethics Committee of the Cork Teaching Hospitals. Patients were not involved in this study.  
42  
43

44  
45 Free GP care was expanded to all children aged under 6 years in July 2015. This age group (0-5  
46  
47 years) was used as the treatment group in the analysis. As CUH provides care for all children  
48  
49 aged 0-15 years, children aged 6-15 years were chosen as the control group.  
50  
51

52  
53 Two time periods were analysed:

- 54  
55 • Time Period 1: from 1<sup>st</sup> July 2012 to 30<sup>th</sup> June 2015;
- 56  
57 • Time Period 2: from 1<sup>st</sup> July 2015 to 30<sup>th</sup> June 2018.
- 58  
59  
60

1  
2  
3 To better understand the overall trend in the paediatric ED attendances in CUH over the 6-  
4  
5 year period, a number of annual ED attendances was also analysed for each study group and  
6  
7  
8 for single year of age (SYOA).  
9

10  
11 We conducted logistic regression analysis stratified by time periods (Time Period 1 and 2) to  
12  
13 assess whether the expansion of free GP care to children under 6 years affected the use of ED  
14  
15 services, with younger children (0-5 years) being the exposed group compared to older  
16  
17 children (6-15 years). The outcome of interest was a GP referral, which represented whether  
18  
19 the ED attendance occurred following a GP referral or not. We conducted three models to  
20  
21 investigate the relationship between children's age and year of attendance on the probability  
22  
23 of ED attendance being a GP referral, using different interaction terms between these  
24  
25 variables.  
26  
27  
28  
29

30  
31 In the first model, we introduced an interaction term between age (0-5 or 6-15 years) and  
32  
33 year of attendance (six categories, from July 2012 until June 2018). In the second model, we  
34  
35 used an interaction term between year of attendance (two categories: (July 2012-June 2015)  
36  
37 or (July 2015-June 2018)) and age in years (as categorical variable). We further explored the  
38  
39 effect of the introduction of free GP service to children under 6 years on CUH ED paediatric  
40  
41 attendances by using an interaction term between age (as continuous variable) and  
42  
43 attendance year (from July 2012 to June 2018) [model 3]. We used interaction to allow the  
44  
45 slope of independent variables to vary based on the main exposures (year of attendance or  
46  
47 children's age). The predictive marginal effects of the interaction terms were plotted to better  
48  
49 visualise how much the predicted probability of being referred by a GP changes with the  
50  
51 change in age and year of attendance. [15] All models were additionally adjusted for  
52  
53 presentation day, time of attendance and discharge destination.  
54  
55  
56  
57  
58  
59  
60

1  
2  
3 We also used cubic splines to model the shape of the association between year of attendance  
4 and the outcome, using the `postrcspline` package. [16] The day of attendance was converted  
5 into months and treated as continuous variable (from July 2012 until June 2018). Spline  
6 coefficients cannot be interpreted directly, therefore, the model was displayed graphically,  
7 showing the predicted adjusted probability of the ED attendance being a GP referral. This  
8 model was adjusted for age, presentation day, attendance time and discharge destination.  
9  
10 We further assessed the discharge destination in children that came through a GP referral  
11 using predictive margins plot to illustrate the results. This analysis was restricted to patients  
12 with a GP referral only, with discharge destination as an outcome  
13 (admitted/transferred/deceased or discharged home). This model was adjusted for  
14 presentation day and time of attendance with an interaction term between children's age and  
15 attendance year (July 2012-June 2015 or July 2015-June 2018). Data analyses were performed  
16 using Stata version 16.1 (StataCorp, College Station, TX, U.S.A.) and a significance level of  
17  $P < 0.05$  was used.

## 38 RESULTS

39  
40  
41 Over the period of 6 years (July 1<sup>st</sup> 2012 – June 30<sup>th</sup> 2018), CUH ED was attended by 76,831  
42 children aged 0-15 years; 42,584 (53.3%) of them came through a GP referral. There was a  
43 14.5% increase in all paediatric attendances in Time Period 2 ( $n = 41,012$ ) compared to Time  
44 Period 1 ( $n = 35,819$ ). The attendances were higher in the 0-5 years group in both study  
45 periods compared to the 6-15 years group (19,199 vs 16,620 in the Time Period 1 and 22,934  
46 vs 18,078 in the Time Period 2 respectively). Table 1 summarises all paediatric attendances  
47 to CUH ED during the two study periods. Figure 1 presents the number of all paediatric CUH  
48 ED attendances by SYOA before (July 2012 – June 2015) and after (July 2015 – June 2018) the  
49  
50  
51  
52  
53  
54  
55  
56  
57  
58  
59  
60

policy change regardless of the mode of referral. The number of CUH ED paediatric attendances was highest in younger children with an increase in ED attendances observed in children under the age of 10 years after the expansion of free GP care to under 6s. There was no change in the volume of presentations in older children.

Table 1. Descriptive statistics of the iPMS data for children under 6 (0 – 5 years) and over 6 (6 – 15 years) who attended CUH ED during the study period (July 1<sup>st</sup> 2012 – June 30<sup>th</sup> 2018).

|                                | <b>Under 6s (0-5 years)</b>  |                              | <b>Over 6s (6 – 15 years)</b> |                              |
|--------------------------------|------------------------------|------------------------------|-------------------------------|------------------------------|
|                                | <b>July 2012 – June 2015</b> | <b>July 2015 – June 2018</b> | <b>July 2012 – June 2015</b>  | <b>July 2015 – June 2018</b> |
| <b>Attendances, n (%)</b>      | 19,199 (53.6)                | 22,934 (55.9)                | 16,620 (46.4)                 | 18,078 (44.1)                |
| <b>Referral Type, n (%)</b>    |                              |                              |                               |                              |
| <i>GP Referrals</i>            | 10,148 (52.9)                | 14,028 (61.2)                | 8,684 (52.3)                  | 9,724 (53.8)                 |
| <i>Non-GP Referrals</i>        | 9,051 (47.1)                 | 8,906 (38.8)                 | 7,936 (47.7)                  | 8,354 (46.2)                 |
| <b>Type of Attendance (%)</b>  |                              |                              |                               |                              |
| <i>New</i>                     | 18,413 (95.9)                | 22,016 (96.0)                | 15,884 (95.6)                 | 17,289 (95.6)                |
| <i>Return</i>                  | 786 (4.1)                    | 918 (4.0)                    | 736 (4.4)                     | 789 (4.4)                    |
| <b>Triage Category (%)</b>     |                              |                              |                               |                              |
| <i>Immediate/Resuscitation</i> | 156 (0.8)                    | 179 (0.8)                    | 72 (0.4)                      | 72 (0.4)                     |
| <i>Very Urgent/Emergency</i>   | 4,766 (24.8)                 | 7,159 (31.2)                 | 2,696 (16.2)                  | 3,768 (20.8)                 |
| <i>Urgent</i>                  | 10,679 (55.6)                | 11,700 (51.0)                | 9,166 (55.2)                  | 9,562 (52.9)                 |
| <i>Standard/Less Urgent</i>    | 2,798 (14.6)                 | 3,401 (14.8)                 | 3,861 (23.2)                  | 4,027 (22.3)                 |
| <i>Not Urgent</i>              | 90 (0.5)                     | 275 (1.2)                    | 146 (0.9)                     | 402 (2.2)                    |
| <i>Not Triage/Return</i>       | 710 (3.7)                    | 220 (1.0)                    | 679 (4.1)                     | 247 (1.4)                    |
| <b>Discharge Dest. (%)</b>     |                              |                              |                               |                              |
| <i>Home</i>                    | 13,707 (71.4)                | 17,225 (75.1)                | 12,491 (75.2)                 | 13,799 (76.3)                |
| <i>Admitted</i>                | 5,031 (26.2)                 | 5,382 (23.5)                 | 3,673 (22.1)                  | 3,938 (21.8)                 |
| <i>Deceased</i>                | 16 (0.1)                     | 8 (0.0)                      | 7 (0.0)                       | 6 (0.0)                      |
| <i>Self-Discharge</i>          | 244 (1.3)                    | 216 (0.9)                    | 242 (1.5)                     | 214 (1.2)                    |
| <i>Other</i>                   | 196 (1.0)                    | 97 (0.4)                     | 202 (1.2)                     | 116 (0.6)                    |

### Insert Figure 1 Here

There was a clear increase in the proportions of children in both groups that were triaged as “Very Urgent/Emergency” (from 24.8% to 31.2% in the 0-5 years group and from 16.2% to 20.8% in the 6-15 years group) and “Non Urgent” (from 0.5% to 1.2% in the 0-5 years group and from 0.9% to 2.2% in the 6-15 years group). At the same time a decrease was observed in the proportion of children in both groups that were triaged as “Urgent” (from 55.6% to 51% in the 0-5 years group and from 55.2% to 52.9% in the 6-15 years group).

1  
2  
3 There was no difference in the proportion of children who attended CUH ED as a new or  
4 return patient during the two time periods in both study groups. Similarly, no statistically  
5 significant differences were observed in the proportions of children that attended on a  
6 particular day of the week between Time Period 1 and 2 for both study groups  
7 (Supplementary table 1).  
8  
9

10  
11  
12  
13  
14  
15  
16 More children attended CUH ED and were discharged home in both age groups in Time Period  
17 2 compared to Time Period 1 (17,225 (75.1%) vs 13,707 (71.4%) in the 0-5 years group and  
18 13,799 (76.3%) vs 12,491 (75.2%) in the 6-15 years group). There was an increase in the actual  
19 number, but a decrease in the proportion of children subsequently admitted to hospital in  
20 both age groups in Time Period 2 compared to Time Period 1 (5,382 (23.5%) vs 5,031 (26.2%)  
21 in the 0-5 years group and 3,938 (21.8%) vs 3,673 (22.1%) in the 6-15 years group).  
22  
23  
24  
25  
26  
27  
28  
29

30  
31 GP referral rates were similar in both groups in Time Period 1 (52.9% in the 0-5 years group  
32 and 52.3% in the 6-15 years group); however, there was a clear increase in GP referral rates  
33 in the 0-5 years group in Time Period 2 with no similar increase in the 6-15 years group (61.2%  
34 in the 0-5 year group and 53.8% in the 6-15 years group). Figure 2 demonstrates the number  
35 of annual CUH ED attendances via a GP and non-GP referral between July 2012 and June 2018  
36 for children aged 0-5 years (Panel A) and 6-15 years (Panel B). This figure clearly shows that  
37 the number of CUH ED attendances through a GP referral in children aged 0-5 years increased  
38 after July 2015 with no similar increase observed in the older group (6-15 years).  
39  
40  
41  
42  
43  
44  
45  
46  
47  
48  
49  
50

51  
52 **Insert Figure 2 (Panel A & B) Here**  
53  
54  
55  
56  
57  
58  
59  
60

The results from the adjusted logistic regression model, with time as a spline explanatory variable, showed an increased probability of CUH ED attendances by children in the 0-5 years group with a GP referral after the expansion of free GP care to under 6s in July 2015 (Figure 3-B). Whereas approximately the same pattern before and after the policy change was observed for ED attendances through a GP referral by children aged 6-15 years (Figure 3-C).

**Insert Figure 3 (A-C) Here**

The results from the stratified analysis suggested a similar patterns of CUH ED attendances being GP referral in both younger and older children in the Time Period 1 (July 2012-June 2015), as crude and adjusted estimates did not reach a significant level (Table 2). However, in the Time Period 2 (July 2015-June 2018) younger children (0-5 years) were more likely to attend CUH ED through a GP referral [adjusted odds ratio=1.39 (95% CI, 1.33, 1.44)] compared to older children (6-15 years) (Figure 4).

*Table 2. Logistic regression of ED attendances being a GP referral stratified by year of attendance (July 2012 – June 2015 and July 2015 – June 2018).*

|                                                   | Crude Odds ratio [95%CI] | Adjusted odds ratio [95%CI]* |
|---------------------------------------------------|--------------------------|------------------------------|
| <b>Year at attendance (July 2012 - June 2015)</b> |                          |                              |
| 0-5 years                                         | 1.02 [0.98, 1.07]        | 1.03 [0.99, 1.08]            |
| 6-15 years                                        | Reference                | Reference                    |
| <b>Year at attendance (July 2015 - June 2018)</b> |                          |                              |
| 0-5 years                                         | 1.35 [1.30, 1.41]        | <b>1.39 [1.33, 1.44]</b>     |
| 6-15 years                                        | Reference                | Reference                    |

\*Adjusted for presentation day, attendance time and discharge destination

**Insert Figure 4 Here**

1  
2  
3 When the analyses were extended by interacting SYOA and year of attendance, the significant  
4 increase in CUH ED attendances was seen in all ages from 0 to 5 years with no significant  
5 increase observed in children from 6 to 15 years. Results from logistic regression analysis  
6 with interaction terms between SYOA and year of attendance show that after July 2015  
7 younger children (0-5 years) were more likely to attend CUH ED through a GP referral (Figures  
8 5 & 6).

9  
10  
11  
12  
13  
14  
15  
16  
17  
18  
19 **Insert Figures 5 & 6 Here**

20  
21 Despite the significant increase in CUH ED attendances via a GP referral in the 0-5 years group  
22 in Time Period 2 and overall increase in the number of children in both age groups that came  
23 through a GP referral and were subsequently admitted to hospital (from 2,719 to 3,321 in 0-  
24 5 years group and from 1,975 to 2,118 in 6-15 years group), a decrease in hospital admission  
25 rates across younger ages in this study group was observed after July 2015. Figure 7  
26 demonstrates the predictive margins with 95% CIs of the probability of ED attendance by  
27 children (0-15 years), that came through a GP referral, resulting in a hospital admission across  
28 SYOA before and after the expansion of free GP care to under 6s.

29  
30  
31  
32  
33  
34  
35  
36  
37  
38  
39  
40  
41  
42 **Insert Figure 7 Here**

## 43 44 45 **DISCUSSION**

46  
47 This study has shown that following the expansion of free GP care to children under 6 years  
48 in Ireland, there was an overall increase in CUH ED attendances with a significant increase in  
49 attendances via a GP referral in children under 6 years. GP referral rates remained higher in  
50 the 0-5 years group during the 3-year period post-expansion. The number of all children who  
51 attended CUH ED and were subsequently admitted to hospital also increased (from 8,704 in  
52  
53  
54  
55  
56  
57  
58  
59  
60

1  
2  
3 Time Period 1 to 9,320 in Time Period 2). However, despite more than an 8% increase in the  
4  
5 GP referral rates in the 0-5 years group after the expansion of free GP care to under 6s, the  
6  
7 hospital admission rates in this category of children decreased by more than 3%.  
8  
9

10  
11 Previous quasi-experimental research study on the same age group in Ireland also reported  
12  
13 an increase in the rate of GP referral to EDs in under 6s following the introduction of free GP  
14  
15 care for under 6s.[17] The percentage increase reported in this study, however, was smaller  
16  
17 than in our study (2% vs 8.3% respectively). This might be explained by the fact that the data  
18  
19 analysed in this study were from 28 different Irish hospitals with different levels of care and  
20  
21 were not reported for individual hospitals. Also, the observation periods in this study were  
22  
23 much shorter than in our study and included only 6 months before and 12 months after the  
24  
25 expansion of free GP care to under 6s, with the relevant 6-months periods compared. A much  
26  
27 higher increase in GP referral rates in the under 6 years group following the policy change in  
28  
29 our study can be explained by the fact that CUH is a major tertiary hospital with an extensive  
30  
31 catchment area. Moreover, the results of our study are based on longer observation periods  
32  
33 with overall and annual attendances compared 3 years before and 3 years after free GP care  
34  
35 for under 6s was introduced.  
36  
37  
38  
39  
40  
41  
42

43 Emergency department crowding is a global phenomenon with many contributing factors  
44  
45 including inadequate access to primary care and specialists, inappropriate patient referral and  
46  
47 the general public expectations of health care delivery.[18] A growing rate of ED attendances,  
48  
49 including paediatric presentations, that contribute to overcrowding of the emergency  
50  
51 services has been reported in a number of countries.[19-21] While the overuse of the  
52  
53 paediatric ED seems a universal problem, differences in the structure of healthcare between  
54  
55 countries have varying impacts. For example, the study from Lombardy found that only 2% of  
56  
57  
58  
59  
60



1  
2  
3 all children in the study were referred to ED by their primary care physician, whereas 89%  
4  
5 presented on parental request with no referral.[21] Different structure of the primary care in  
6  
7 Italy where family paediatricians provide primary health care to all children under the age of  
8  
9 6 years and optionally, depending on parental preferences, up to the age of 14 years, might  
10  
11 partially explain the low referral rate to ED by primary care physicians. Whereas the high self-  
12  
13 referral rate could be explained by the fact that in Italy all paediatric ED attendances under  
14  
15 the age of 14 years are free of charge regardless of the mode of presentation.[21]  
16  
17  
18  
19

20  
21 It is obvious that the impact of free GP care expansion on paediatric ED use is multifactorial  
22  
23 and clearly dependent on the existing health care system. In our study, a significant increase  
24  
25 in GP referrals to ED for children aged 0-5 years is important for several reasons. Firstly, it  
26  
27 might be reflective of increased pressure placed on already strained primary care system by  
28  
29 increased demand and insufficient number of GPs to meet this demand.[10] Secondly,  
30  
31 increased paediatric ED attendances are likely to contribute to ED overcrowding. When free  
32  
33 GP care was expanded to children under 6 years of age in Ireland, no structural reorganisation  
34  
35 or financial support was introduced for the upstream services, including ED. Secondly, despite  
36  
37 significant increases in GP referrals of children under 6 years to CUH ED, there was a  
38  
39 significant drop in hospital admission rates in this category of patients, the largest reaching  
40  
41 more than 7% in children aged 4 to 5 years. This might suggest that some of these ED  
42  
43 presentations may have been for ambulatory care sensitive conditions or driven by a desire  
44  
45 by parents and GPs to have a second opinion to resolve diagnostic uncertainty for conditions  
46  
47 that ultimately transpired to be self-limiting.  
48  
49  
50  
51  
52  
53

54  
55 Based on our findings several conclusions can be drawn. As the introduction of free GP care  
56  
57 for children under 6s increases pressure on paediatric ED services, there is a strong need for  
58  
59  
60

1  
2  
3 investment in paediatric emergency medicine in Ireland in order to meet the increasing  
4 demands of these increasing ED presentation rates. A short stay paediatric unit, for example,  
5  
6 has been shown to improve patient care in a cost-effective way and it could be a useful  
7  
8 addition to the existing ED services.[22] Supplying the ED with the appropriate support  
9  
10 structures and adequate staffing must also be considered.  
11  
12  
13  
14

15  
16 Better support for the primary care providers is also important. Introduction of a capitation  
17  
18 payment system in Norway led to an increased GP referral rates to private hospitals and  
19  
20 clinics, possibly because there was no financial incentive to undertake the procedures in the  
21  
22 GP clinic. [23] Some of the possible options, therefore would be to consider a blended model  
23  
24 whereby GPs are remunerated for simple procedures when appropriate, for example for  
25  
26 managing minor injuries. A further recommendation could also include widening the GPs  
27  
28 access to simple diagnostics, in particular x-ray. The introduction of telemedicine  
29  
30 consultations with general paediatricians and paediatric specialists for GPs,[24] as well as  
31  
32 establishing new acute paediatric assessment services such as rapid access clinics and  
33  
34 paediatric assessment units,[25, 26] should also be explored.  
35  
36  
37  
38  
39  
40

### 41 **Strengths and limitations**

42  
43  
44

45 This study has evaluated the paediatric ED attendances of the major tertiary referral centre 3  
46  
47 years before and 3 years after the expansion of free GP care to children aged under 6 years.  
48  
49 The observations collected over a 6-years period allow to avoid the seasonal variation in  
50  
51 paediatric attendances bias.  
52  
53

54  
55 Several limitations are recognised in this study. First, due to the large dataset and inconsistent  
56  
57 data entry we were unable to analyse the reason for CUH ED attendance by patients. This  
58  
59 information would have been useful to better understand the spectrum of reasons for GP  
60

1  
2  
3 referrals and therefore, help to design potential solutions for the primary care support.  
4  
5 Secondly, our findings might not be applicable to other Irish hospitals with smaller catchment  
6  
7 areas and different ED structures.  
8  
9

## 10 11 **CONCLUSION**

12  
13  
14 Our study shows that there was a significant increase in paediatric GP referrals to CUH ED  
15  
16 following the expansion of free GP care to children under 6 years. This increased use of the  
17  
18 paediatric ED services might be reflective of the struggle of the primary care to meet the  
19  
20 increased healthcare system demand and might have serious implications for the quality and  
21  
22 safety of patients' hospital care. It is of vital importance to develop strategies to support both  
23  
24 primary and secondary health care before the next phase of Universal GP Care is rolled out.  
25  
26  
27

28  
29  
30 **Contributors** All the authors contributed equally to the study. IK and CD were involved in  
31  
32 designing the study and planning the data analysis. SA and IK undertook the statistical  
33  
34 analysis. IK wrote the first draft of the manuscript. ES was involved in data collection and  
35  
36 management. RO'B, CB and CD contributed in writing the manuscript. CD supervised the  
37  
38 study. All authors contributed to and have approved the final manuscript.  
39  
40  
41

42  
43 **Funding** The study had no financial support.  
44  
45

46  
47 **Competing interests** None declared.  
48

49  
50 **Patient consent** Not required.  
51

### 52 **Figures' legends:**

53  
54  
55 **Figure 1.** Number of all CUH ED paediatric attendances (0 – 15 years) by age: July 2012 – June  
56  
57 2015 and July 2015 – June 2018.

58  
59 **Figure 2.** Number of annual CUH ED paediatric attendances through GP and non-GP referrals  
60  
in children 0-5 (Panel A) and 6-15 (Panel B) years of age: July 2012 – June 2018.

1  
2  
3 **Figure 1.** Spline plots of the relationship between ED attendance being a GP referral and time  
4 of attendance (time as spline explanatory variable). The model was adjusted for age,  
5 discharge destination, presentation day and attendance time. A) included all children (0-15  
6 years); B) restricted to children aged 0-5 years; C) restricted to children aged 6-15 years.  
7  
8

9 **Figure 4.** Predictive margins with 95% CIs of the probability of ED attendance being a GP  
10 referral with an interaction term between attendance period and age group (0-5 and 6-15  
11 years). The model was adjusted for discharge destination, presentation day and time of  
12 attendance.  
13

14 **Figure 5.** Predictive margins with 95% CIs of the probability of ED attendance being through a  
15 GP referral with an interaction term between SYOA (categorical) and attendance period (July  
16 2012 – June 2015 and July 2015 – June 2018). The model was adjusted for discharge  
17 destination, time of attendance and presentation date.  
18  
19

20 **Figure 6.** Predictive margins with 95% CIs of the probability of ED attendance by children (0-  
21 15 years) being a GP referral across single year of age: July 2012 – June 2018. This model  
22 included an interaction term between SYOA (continuous) and year of attendance, and was  
23 adjusted for discharge destination, presentation day and time of attendance.  
24  
25

26 **Figure 7.** Predictive margins with 95% CIs of the probability of ED attendance by children (0-  
27 15 years), that came through a GP referral, resulting in a hospital admission across single year  
28 of age: July 2012 – June 2015 and July 2015 – June 2018. This analysis was restricted to  
29 patients with a GP referral only (n = 42,584). This model included an interaction term between  
30 children's age and attendance period (July 2012 – June 2015 and July 2015 – June 2018), and  
31 was adjusted for presentation day and time of attendance.  
32  
33  
34  
35  
36  
37  
38  
39  
40  
41  
42  
43  
44  
45  
46  
47  
48  
49  
50  
51  
52  
53  
54  
55  
56  
57  
58  
59  
60

## REFERENCES

- 1 Case A, Fertig A, Paxson C. The lasting impact of childhood health and circumstance. *J Health Econ.* 2005;24(2):365-89.doi:10.1016/j.jhealeco.2004.09.008
- 2 Lundborg P, Nilsson A, Rooth DO. Adolescent health and adult labor market outcomes. *J Health Econ.* 2014;37(1):25-40.doi:10.1016/j.jhealeco.2014.05.003
- 3 Nilsson A, Paul A. Patient cost-sharing, socioeconomic status, and children's health care utilization. *J Health Econ.* 2018;59:109-24.doi:<https://doi.org/10.1016/j.jhealeco.2018.03.006>
- 4 Smith JP. The Impact of Childhood Health on Adult Labor Market Outcomes. *Rev Econ Stat.* 2009;91(3):478-89.doi:10.1162/rest.91.3.478
- 5 Kringos D, Boerma W, Bourgueil Y, et al. The strength of primary care in Europe: an international comparative study. *Br J Gen Pract.* 2013;63(616):e742-50.doi:10.3399/bjgp13X674422
- 6 Connolly S, Nolan A, Walsh B, et al. Universal GP Care in Ireland: Potential Cost Implications [GP care; healthcare expenditure; Ireland]. 2018 [updated 2018-04-06. 2018-03-27:[Available from: <https://www.esri.ie/publications/universal-gp-care-in-ireland-potential-cost-implications> accessed April 5th 2020.
- 7 A Framework for Improved Health and Wellbeing 2013-2023: Department of Health; 2013 [Available from: <https://health.gov.ie/wp-content/uploads/2014/03/HealthyIrelandBrochureWA2.pdf> accessed September 30th 2019.
- 8 Kaestner R, Lo Sasso AT. Does seeing the doctor more often keep you out of the hospital? *J Health Econ.* 2015;39:259-72.doi:10.1016/j.jhealeco.2014.08.003
- 9 PCRS. Statistical analysis of claims and payments 2017 [Available from: <https://www.hse.ie/eng/staff/pcrs/pcrs-publications/pcrs-annual-report-2016.pdf> accessed April 15th 2020.
- 10 O'Callaghan ME, Zgaga L, O'Ciardha D, et al. Free Children's Visits and General Practice Attendance. *Ann Fam Med.* 2018;16(3):246-9.doi:10.1370/afm.2229
- 11 Collins C MG, O'Ciardha D, Ryan K. Irish College of General Practitioners (ICGP). Planning for the future Irish general practitioner workforce—*informed by a national survey of GP trainees and recent GP graduates 2017* [Available from: [http://www.lenus.ie/hse/bitstream/10147/617140/1/Planning\\_for\\_the\\_Future\\_Irish\\_General\\_Practitioner\\_Workforce.pdf](http://www.lenus.ie/hse/bitstream/10147/617140/1/Planning_for_the_Future_Irish_General_Practitioner_Workforce.pdf) accessed April 5th 2020.
- 12 Teljeur C, Thomas S, O'Kelly FD, et al. General practitioner workforce planning: assessment of four policy directions. *BMC Health Serv Res.* 2010;10:148.doi:10.1186/1472-6963-10-148
- 13 CUH.HSE. 2020 [Available from: <http://www.cuh.hse.ie/> accessed May 5th 2020.
- 14 Emergency Department Profile: Irish Association for Emergency Medicine; [Available from: <http://www.iaem.ie/public/irish-emergency-departments/cork-university-hospital-cuh/> accessed September 30th 2019.
- 15 Orsini N, Greenland S. A Procedure to Tabulate and Plot Results after Flexible Modeling of a Quantitative Covariate. *The Stata Journal.* 2011;11(1):1-29.doi:10.1177/1536867x1101100101
- 16 Buis ML. POSTRCSPLINE: Stata module containing post-estimation commands for models using a restricted cubic spline. *Statistical Software Components S456928.* Boston College Department of Economics.2008///Apr.
- 17 Walsh B, Nolan A, Brick A, et al. Did the expansion of free GP care impact demand for Emergency Department attendances? A difference-in-differences analysis. *Soc Sci Med.* 2019;222:101-11.doi:<https://doi.org/10.1016/j.socscimed.2018.12.029>
- 18 Jayaprakash N, O'Sullivan R, Bey T, et al. Crowding and delivery of healthcare in emergency departments: the European perspective. *West J Emerg Med.* 2009;10(4):233-9.doi:

- 1  
2  
3 19 Cheek JA, Braitberg G, Craig S, et al. Why do children present to emergency departments?  
4 Exploring motivators and measures of presentation appropriateness for children presenting to a  
5 paediatric emergency department. *J Paediatr Child Health*. 2017;53(5):451-7.doi:10.1111/jpc.13482  
6  
7 20 Centers for Disease Control and Prevention. National Health Interview Survey 2018  
8 [Available from: <https://www.cdc.gov/nchs/nhis/SHS.htm> accessed July 10th 2020.  
9  
10 21 Riva B, Clavenna A, Cartabia M, et al. Emergency department use by paediatric patients in  
11 Lombardy Region, Italy: a population study. *BMJ Paediatr Open*.  
12 2018;2(1):e000247.doi:10.1136/bmjpo-2017-000247  
13 22 Browne GJ. A short stay or 23-hour ward in a general and academic children's hospital: are  
14 they effective? *Pediatr Emerg Care*. 2000;16(4):223-9.doi:10.1097/00006565-200008000-00001  
15 23 Iversen T, Lurås H. The effect of capitation on GPs' referral decisions. *Health Econ*.  
16 2000;9(3):199-210.doi:10.1002/(sici)1099-1050(200004)9:3<199::Aid-hec514>3.0.Co;2-2  
17 24 Burke BL, Jr., Hall RW, Section On Telehealth C. Telemedicine: Pediatric Applications.  
18 *Pediatrics*. 2015;136(1):e293-e308.doi:10.1542/peds.2015-1517  
19 25 Ogilvie D. Hospital based alternatives to acute paediatric admission: a systematic review.  
20 *Arch Dis Child*. 2005;90(2):138-42.doi:10.1136/adc.2003.035543  
21 26 Williams L, Fryer J, Andrew R, et al. Setting up a Paediatric Rapid Access Outpatient Unit:  
22 views of general practice teams. *BMC Fam Pract*. 2008;9:54-.doi:10.1186/1471-2296-9-54  
23  
24  
25  
26  
27  
28  
29  
30  
31  
32  
33  
34  
35  
36  
37  
38  
39  
40  
41  
42  
43  
44  
45  
46  
47  
48  
49  
50  
51  
52  
53  
54  
55  
56  
57  
58  
59  
60

1  
2  
3  
4  
5  
6  
7  
8  
9  
10  
11  
12  
13  
14  
15  
16  
17  
18  
19  
20  
21  
22  
23  
24  
25  
26  
27  
28  
29  
30  
31  
32  
33  
34  
35  
36  
37  
38  
39  
40  
41  
42  
43  
44  
45  
46  
47  
48  
49  
50  
51  
52  
53  
54  
55  
56  
57  
58  
59  
60

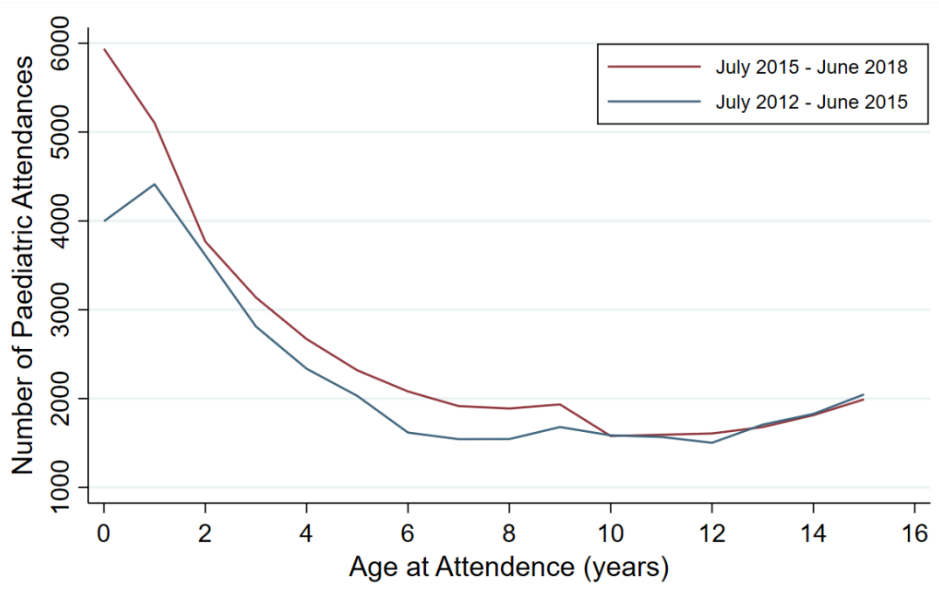

ntial: For Review Only

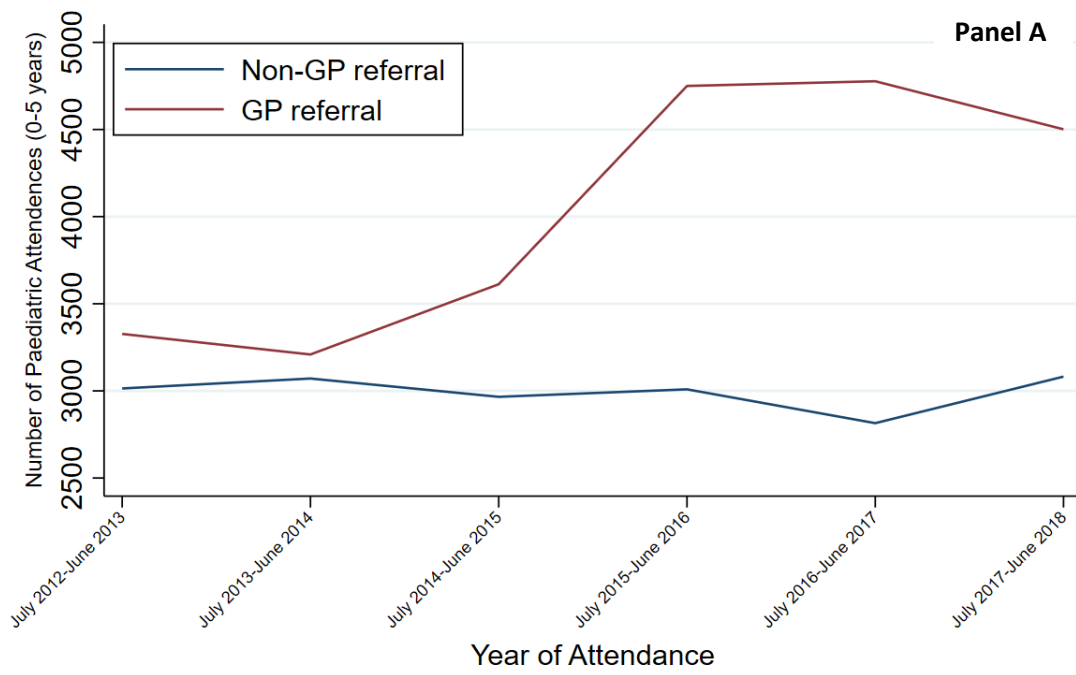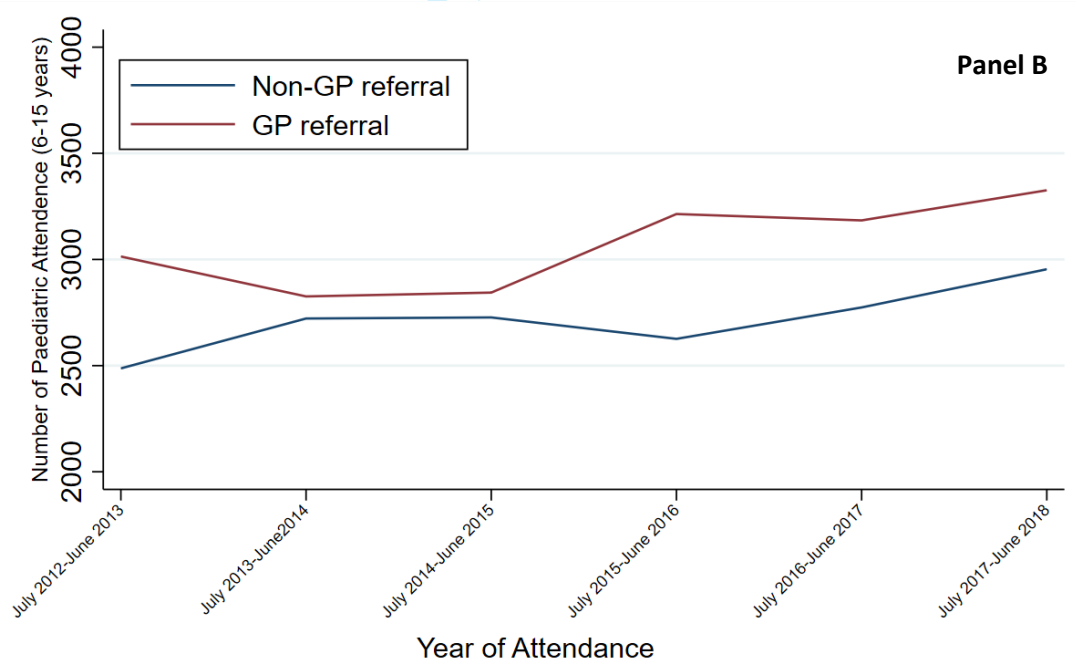



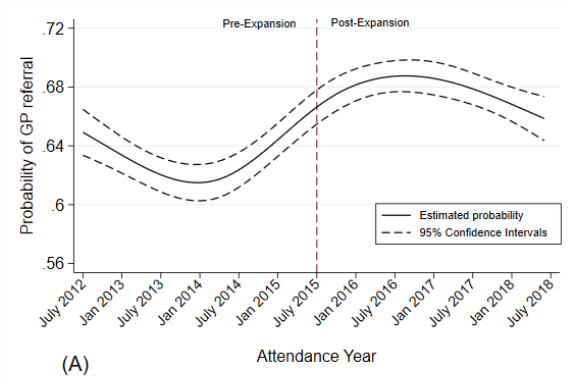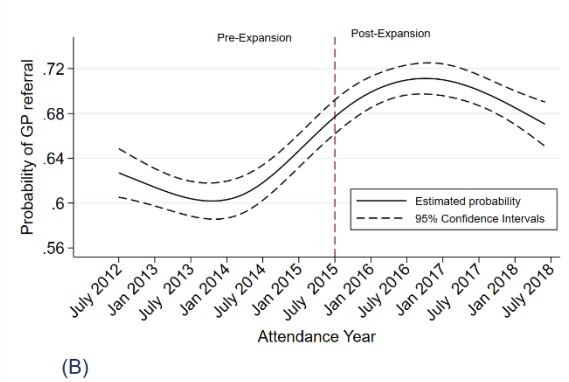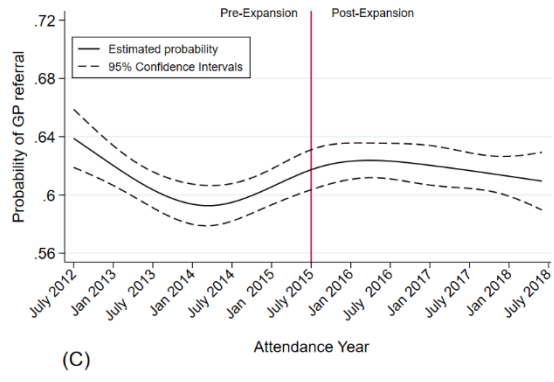

For Review Only

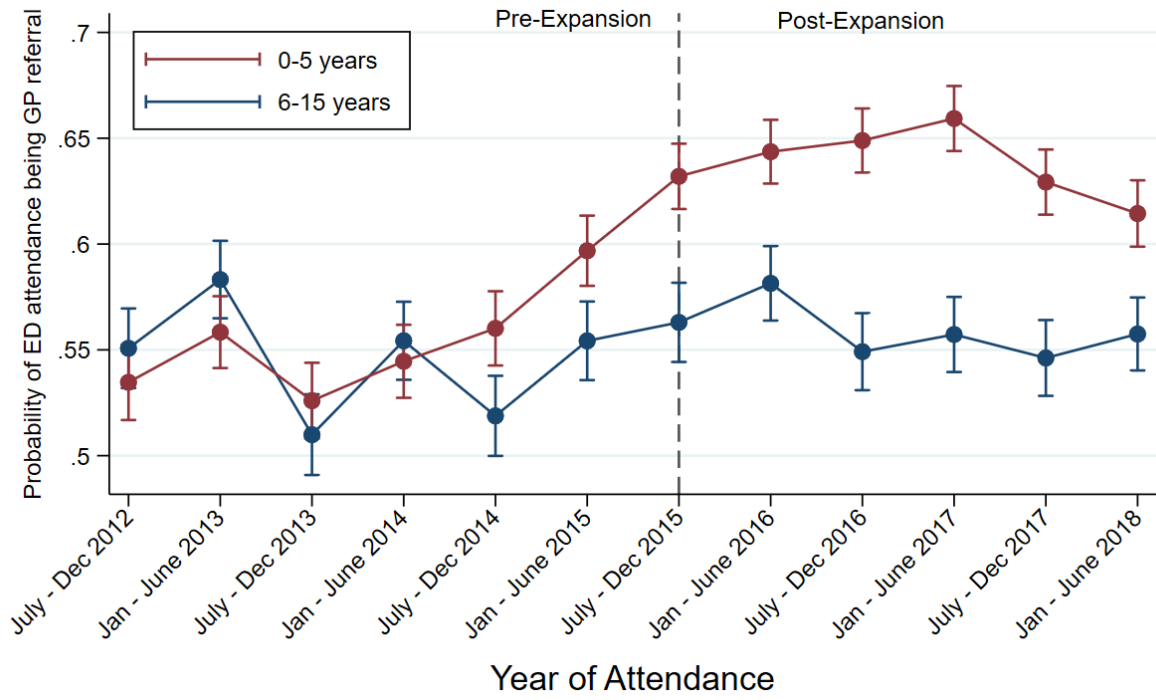

Pre-Expansion Post-Expansion

0-5 years 6-15 years

Probability of ED attendance being GP referral

Year of Attendance

For Review Only

1  
2  
3  
4  
5  
6  
7  
8  
9  
10  
11  
12  
13  
14  
15  
16  
17  
18  
19  
20  
21  
22  
23  
24  
25  
26  
27  
28  
29  
30  
31  
32  
33  
34  
35  
36  
37  
38  
39  
40  
41  
42  
43  
44  
45  
46  
47  
48  
49  
50  
51  
52  
53  
54  
55  
56  
57  
58  
59  
60

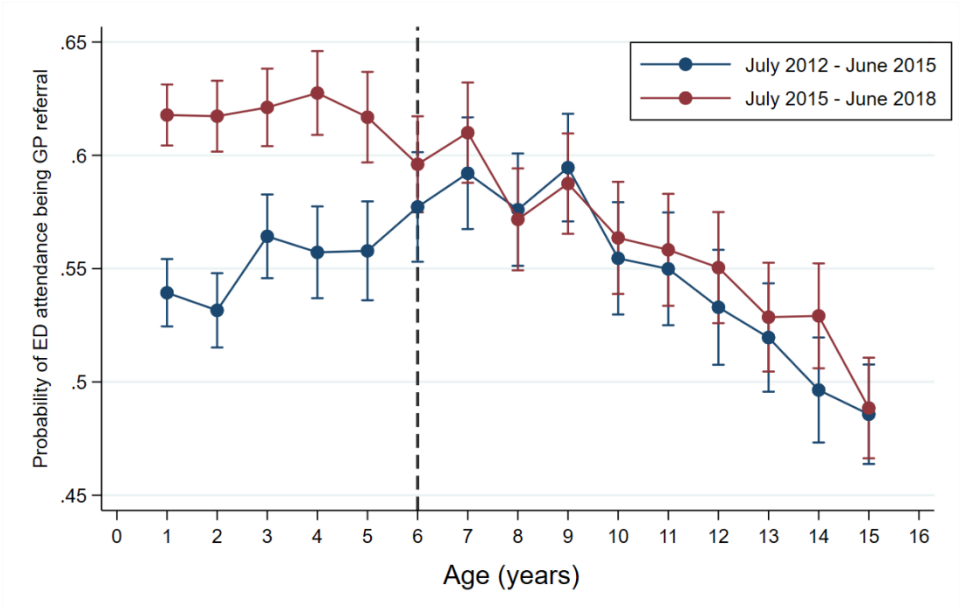

Initial: For Review Only

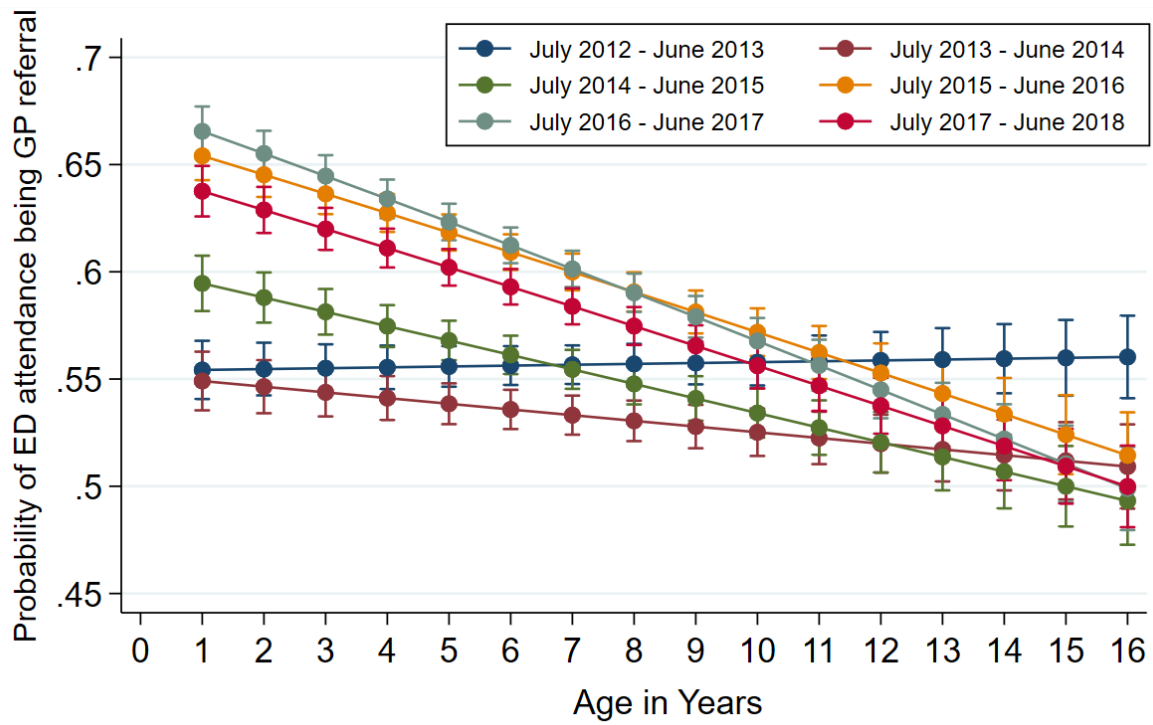

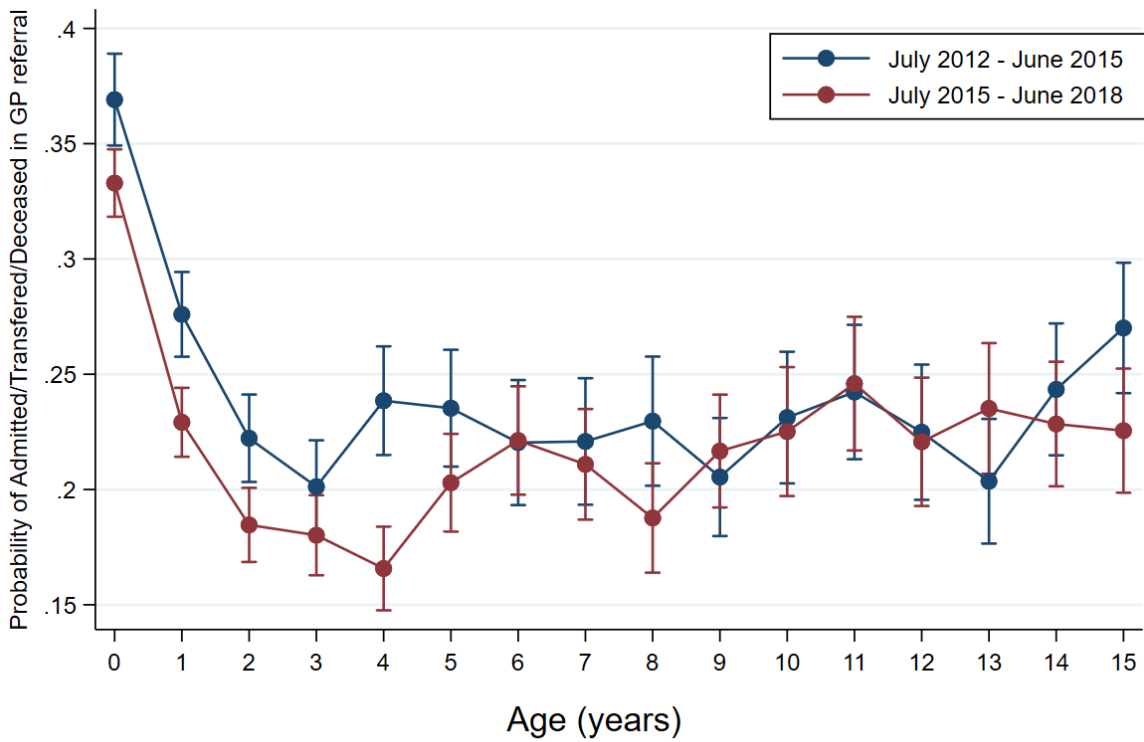

For Review Only

1  
2  
3  
4  
5  
6  
7  
8  
9  
10  
11  
12  
13  
14  
15  
16  
17  
18  
19  
20  
21  
22  
23  
24  
25  
26  
27  
28  
29  
30  
31  
32  
33  
34  
35  
36  
37  
38  
39  
40  
41  
42  
43  
44  
45  
46  
47  
48  
49  
50  
51  
52  
53  
54  
55  
56  
57  
58  
59  
60

## Supplementary Tables

Table 1. Descriptive statistics of the iPMS data (attendances according to the day of the week and time of the day) for children aged 0-5 and 6-15 years who attended CUH ED during the study period (July 1<sup>st</sup> 2012 – June 30<sup>th</sup> 2018).

|                           | 0 - 5 years           |                       |                              | 6 - 15 years          |                       |                              |
|---------------------------|-----------------------|-----------------------|------------------------------|-----------------------|-----------------------|------------------------------|
|                           | July 2012 – June 2015 | July 2015 – June 2018 | <i>P</i> -value <sup>a</sup> | July 2012 – June 2015 | July 2015 – June 2018 | <i>P</i> -value <sup>a</sup> |
| <b>Attendances, n (%)</b> | 19,199 (53.6)         | 22,934 (55.9)         |                              | 16,620 (46.4)         | 18,078 (44.1)         |                              |
| <b>Day of Week (%)</b>    |                       |                       |                              |                       |                       |                              |
| <i>Sunday</i>             | 2,635 (13.7)          | 3,025 (13.2)          | 0.109                        | 2,065 (12.4)          | 2,172 (12.0)          | 0.244                        |
| <i>Monday</i>             | 2,940 (15.3)          | 3,647 (15.9)          | 0.097                        | 2,707 (16.3)          | 2,908 (16.1)          | 0.610                        |
| <i>Tuesday</i>            | 2,707 (14.1)          | 3,292 (14.4)          | 0.456                        | 2,481 (14.9)          | 2,710 (15.0)          | 0.807                        |
| <i>Wednesday</i>          | 2,745 (14.3)          | 3,279 (14.3)          | 0.999                        | 2,421 (14.6)          | 2,812 (15.6)          | 0.010                        |
| <i>Thursday</i>           | 2,746 (14.3)          | 3,198 (13.9)          | 0.292                        | 2,441 (14.7)          | 2,662 (14.7)          | 0.920                        |
| <i>Friday</i>             | 2,722 (14.2)          | 3,416 (14.9)          | 0.038                        | 2,261 (13.6)          | 2,538 (14.0)          | 0.241                        |
| <i>Saturday</i>           | 2,704 (14.1)          | 3,077 (13.4)          | 0.047                        | 2,244 (13.5)          | 2,276 (12.6)          | 0.012                        |
| <b>Time (%)</b>           |                       |                       |                              |                       |                       |                              |
| 00:00-05:59               | 1,529 (8.0)           | 1,767 (7.7)           | 0.032                        | 834 (5.0)             | 905 (5.0)             | 0.377                        |
| 06:00-11:59               | 3,543 (18.5)          | 4,080 (17.8)          | 0.078                        | 3,308 (19.9)          | 3,719 (20.6)          |                              |
| 12:00-17:59               | 7,440 (38.8)          | 9,197 (40.1)          | <b>0.005</b>                 | 6,427 (38.7)          | 6,999 (38.7)          |                              |
| 18:00-23:59               | 6,687 (34.8)          | 7,890 (34.4)          | 0.359                        | 6,051 (36.4)          | 6,455 (35.7)          |                              |

<sup>a</sup>  $\chi^2$  test (2-sided); Bonferroni correction was used for multiple comparisons if *P* was less than 0.05 in the initial  $\chi^2$  test for tables larger than 2 x 2. The results that remained statistically significant after the Bonferroni correction are highlighted in bold.
