# Supplementary material for: Paediatric attendances of the emergency department in a major Irish tertiary referral centre before and after expansion of free GP care to children under 6: a retrospective observational study
Source: PubMed Central journal article supplement — BMJ Paediatr Open. 2021 Feb 17;5(1):e000862. doi: 10.1136/bmjpo-2020-000862 (PMC7893646; doi:10.1136/bmjpo-2020-000862), 2021-02-17
Supplement: bmjpo-2020-000862supp001.pdf [file bmjpo-2020-000862supp001.pdf]

## Supplementary Tables

Table 1. Descriptive statistics of the iPMS data (attendances according to the day of the week and time of the day) for children aged 0-5 and 6-15 years who attended CUH ED during the study period (July 1<sup>st</sup> 2012 – June 30<sup>th</sup> 2018).

|                           | 0 - 5 years           |                       |                      | 6 - 15 years          |                       |                      |
|---------------------------|-----------------------|-----------------------|----------------------|-----------------------|-----------------------|----------------------|
|                           | July 2012 – June 2015 | July 2015 – June 2018 | P-value <sup>a</sup> | July 2012 – June 2015 | July 2015 – June 2018 | P-value <sup>a</sup> |
| <b>Attendances, n (%)</b> | 19,199 (53.6)         | 22,934 (55.9)         |                      | 16,620 (46.4)         | 18,078 (44.1)         |                      |
| <b>Day of Week (%)</b>    |                       |                       |                      |                       |                       |                      |
| Sunday                    | 2,635 (13.7)          | 3,025 (13.2)          | 0.109                | 2,065 (12.4)          | 2,172 (12.0)          | 0.244                |
| Monday                    | 2,940 (15.3)          | 3,647 (15.9)          | 0.097                | 2,707 (16.3)          | 2,908 (16.1)          | 0.610                |
| Tuesday                   | 2,707 (14.1)          | 3,292 (14.4)          | 0.456                | 2,481 (14.9)          | 2,710 (15.0)          | 0.807                |
| Wednesday                 | 2,745 (14.3)          | 3,279 (14.3)          | 0.999                | 2,421 (14.6)          | 2,812 (15.6)          | 0.010                |
| Thursday                  | 2,746 (14.3)          | 3,198 (13.9)          | 0.292                | 2,441 (14.7)          | 2,662 (14.7)          | 0.920                |
| Friday                    | 2,722 (14.2)          | 3,416 (14.9)          | 0.038                | 2,261 (13.6)          | 2,538 (14.0)          | 0.241                |
| Saturday                  | 2,704 (14.1)          | 3,077 (13.4)          | 0.047                | 2,244 (13.5)          | 2,276 (12.6)          | 0.012                |
| <b>Time (%)</b>           |                       |                       |                      |                       |                       |                      |
| 00:00-05:59               | 1,529 (8.0)           | 1,767 (7.7)           | 0.032                | 834 (5.0)             | 905 (5.0)             | 0.377                |
| 06:00-11:59               | 3,543 (18.5)          | 4,080 (17.8)          | 0.078                | 3,308 (19.9)          | 3,719 (20.6)          |                      |
| 12:00-17:59               | 7,440 (38.8)          | 9,197 (40.1)          | <b>0.005</b>         | 6,427 (38.7)          | 6,999 (38.7)          |                      |
| 18:00-23:59               | 6,687 (34.8)          | 7,890 (34.4)          | 0.359                | 6,051 (36.4)          | 6,455 (35.7)          |                      |

<sup>a</sup>  $\chi^2$  test (2-sided); Bonferroni correction was used for multiple comparisons if *P* was less than 0.05 in the initial  $\chi^2$  test for tables larger than 2 x 2. The results that remained statistically significant after the Bonferroni correction are highlighted in bold.
